# Supplementary material for: Penicimenolides A-F, Resorcylic Acid Lactones from Penicillium sp., isolated from the Rhizosphere Soil of Panax notoginseng
Source: PubMed Central journal article supplement (PMC4897632; doi:10.1038/srep27396), 2016-06-08

## Supplementary Information

### Penicimenolides A-F, Resorcylic Acid Lactones from *Penicillium* sp., isolated from the Rhizosphere Soil of *Panax notoginseng*

Ya-Nan An<sup>1+</sup>, Xue Zhang<sup>1+</sup>, Tian-Yuan Zhang<sup>1</sup>, Meng-Yue Zhang<sup>1</sup>, Qian-Zhang<sup>2</sup>, Xiao-Yu Deng<sup>1</sup>, Feng Zhao<sup>2</sup>, Ling-Juan Zhu<sup>1</sup>, Guan Wang<sup>1</sup>, Jie Zhang<sup>1</sup>, Yi-Xuan Zhang<sup>1\*</sup>, Bo Liu<sup>3\*</sup>, and Xin-Sheng Yao<sup>1,4\*</sup>

<sup>1</sup>Shenyang Pharmaceutical University, Shenyang 110016, People's Republic of China

<sup>2</sup>School of Pharmacy, Key Laboratory of Molecular Pharmacology and Drug Evaluation (Yantai University), Ministry of Education, Collaborative Innovation Center of Advanced Drug Delivery System and Biotech Drugs in Universities of Shandong, Yantai University, Yantai 264005, People's Republic of China

<sup>3</sup>State Key Laboratory of Biotherapy and Cancer Center, West China Hospital, Sichuan University, and Collaborative Innovation Center of Biotherapy, Chengdu 610041, People's Republic of China

<sup>4</sup>Institute of Traditional Chinese Medicine & Natural Products, College of Pharmacy, Jinan University, Guangzhou 510632, People's Republic of China

<sup>+</sup>These authors contributed equally to this work.

Correspondence and requests for materials should be addressed to X.S. Yao (E-mail:

[tyaoxs@jnu.edu.cn](mailto:tyaoxs@jnu.edu.cn)), Y.X.Zhang ([zhangyxzsh@163.com](mailto:zhangyxzsh@163.com)) or B. Liu ([liubo2400@scu.edu.cn](mailto:liubo2400@scu.edu.cn))

## List of Supporting Information

|                                                                                                       |    |
|-------------------------------------------------------------------------------------------------------|----|
| 1. Acetylation of <b>2</b> and <b>12</b> .....                                                        | 2  |
| 2. Alkaline hydrolysis of <b>3</b> .....                                                              | 3  |
| 3. NMR spectra of compound <b>1-6</b> .....                                                           | 3  |
| 4. NMR data of compound <b>8</b> .....                                                                | 33 |
| 5. <sup>1</sup> H-NMR chemical shift differences for the MTPA esters of <b>3,5</b> and <b>6</b> ..... | 34 |
| 6. Single crystal X-ray diffraction analysis of compound <b>10</b> .....                              | 35 |
| 7. CheckCIFPLATON report of compound <b>10</b> .....                                                  | 50 |

### 1. Acetylation of **2** and **12**.

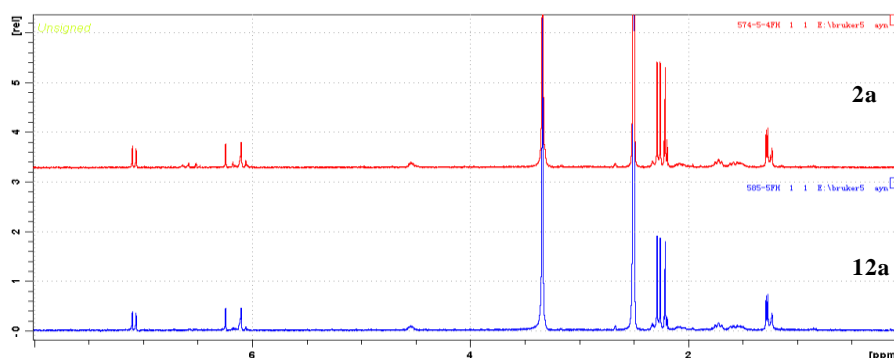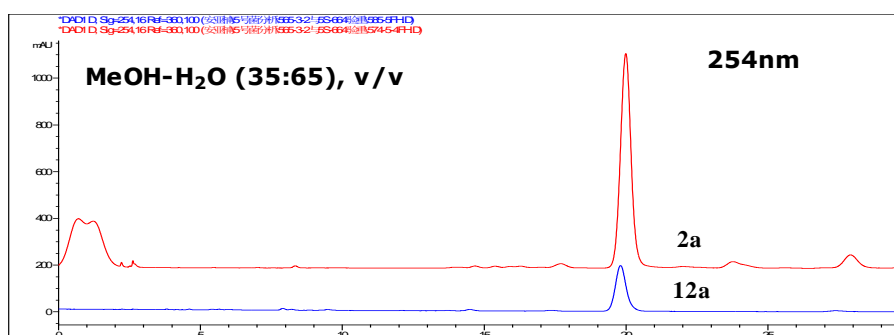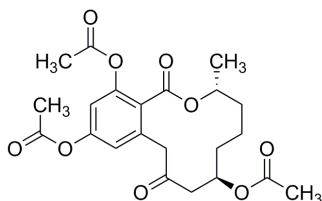

Figure S1 The <sup>1</sup>H-NMR spectra, HPLC analysis and structures of **2a** and **12a**

## 2. Alkaline hydrolysis of 3.

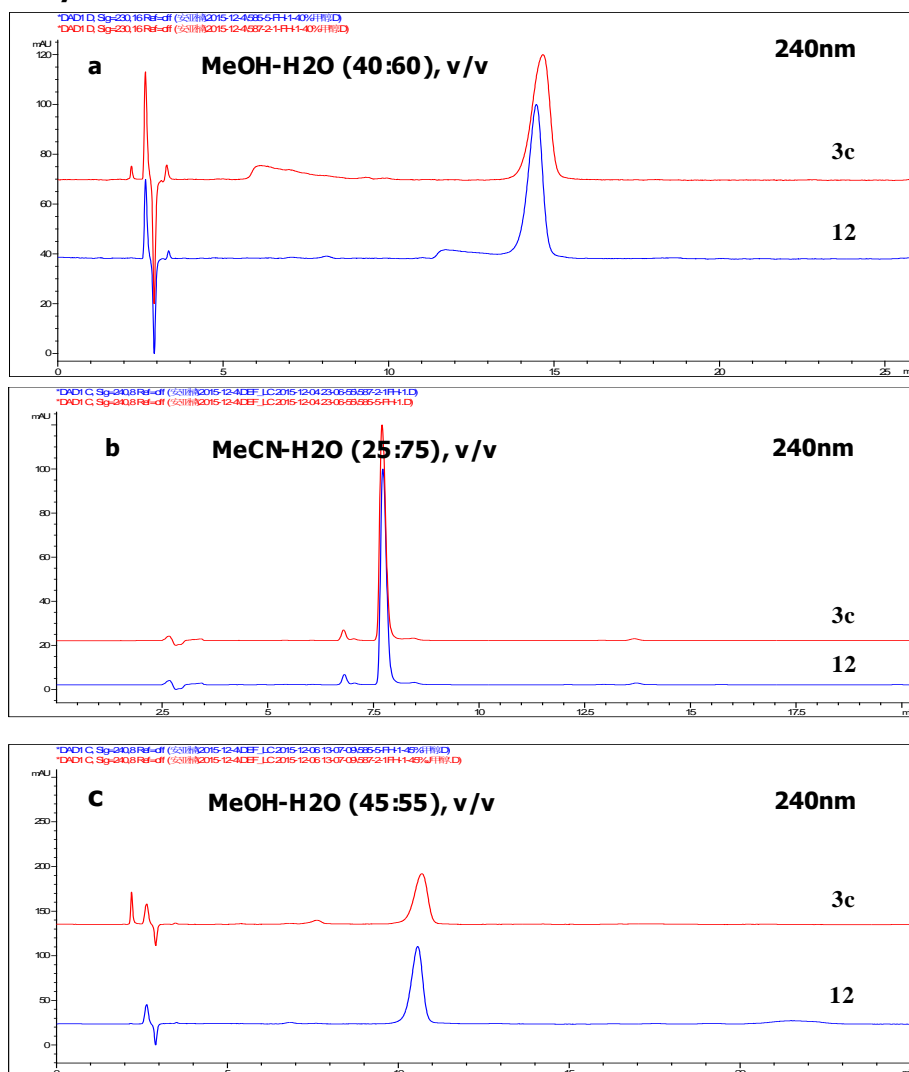

Figure S2 The alkaline hydrolysis product **3c** was compared with **12** by HPLC with three eluting systems (a: MeOH-H<sub>2</sub>O (40:60, v/v), at a flow rate of 1 mL/min; b: MeOH-H<sub>2</sub>O (45:55, v/v), at a flow rate of 1 mL/min; c: MeCN-H<sub>2</sub>O (25:75, v/v), at a flow rate of 1 mL/min)

## 3. The spectra of compounds 1-6.

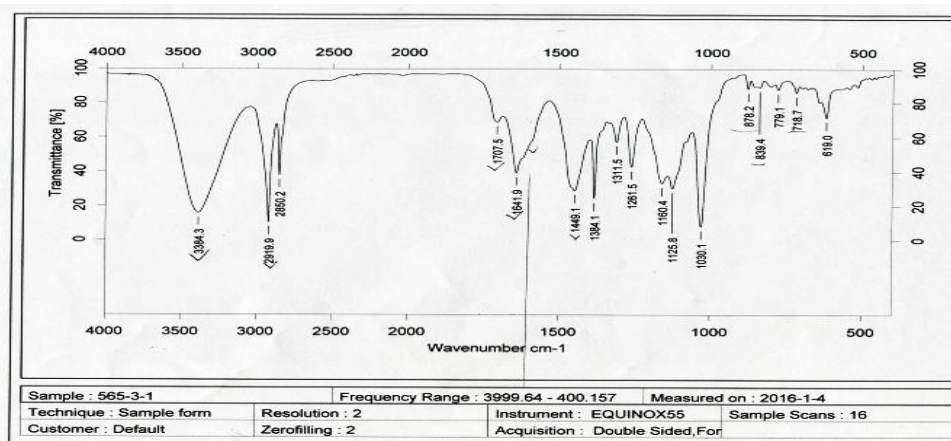

Figure S3 IR (KBr disc) spectrum of penicimenolide A (**1**)

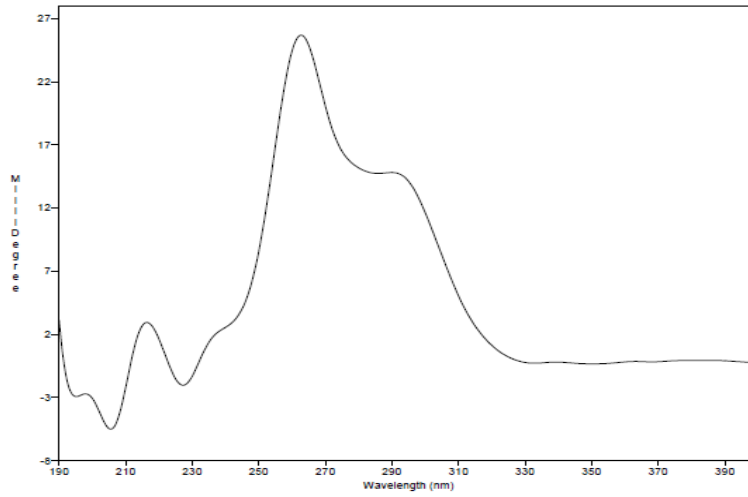

Figure S4 CD spectrum of penicimenolide A (**1**) in MeOH

### Spectrum Peak Pick Report

FIELD FIELD TEXT

Data Set: 没有

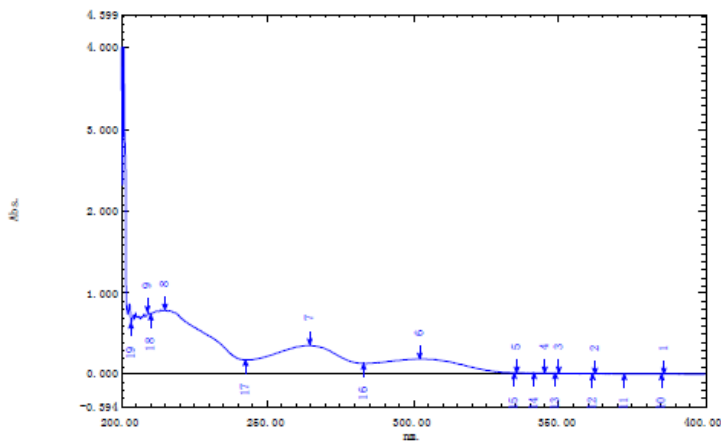

测定属性  
 波长范围 (nm.): 200.00到400.00  
 扫描速度: 高速  
 采样间隔: 0.2  
 自动采样间隔: 停用  
 扫描模式: 单一的

试样准备属性

重量: 0.5  
 体积: 10  
 稀释: 407  
 光程长:

附加信息:

仪器属性  
 仪器类型: UV-1700  
 测定方式: 吸光度  
 狭缝宽: 1.0 nm  
 光源改变波长: 540.8 nm  
 s/n 转换: 标准

附件属性

附件: 无

| No. | P/V | Wavelength | Abs. | 描述 |
|-----|-----|------------|------|----|
| 1   | ●   | 386.00     | .008 |    |
| 2   | ●   | 362.40     | .013 |    |
| 3   | ●   | 350.00     | .018 |    |
| 4   | ●   | 345.00     | .018 |    |
| 5   | ●   | 335.40     | .024 |    |
| 6   | ●   | 302.20     | .193 |    |
| 7   | ●   | 264.60     | .359 |    |
| 8   | ●   | 214.80     | .792 |    |
| 9   | ●   | 209.00     | .758 |    |
| 10  | ●   | 385.20     | .007 |    |
| 11  | ●   | 372.40     | .008 |    |
| 12  | ●   | 361.60     | .012 |    |
| 13  | ●   | 348.60     | .015 |    |
| 14  | ●   | 341.60     | .016 |    |
| 15  | ●   | 334.60     | .018 |    |
| 16  | ●   | 283.00     | .137 |    |
| 17  | ●   | 242.60     | .161 |    |
| 18  | ●   | 210.00     | .738 |    |
| 19  | ●   | 203.20     | .640 |    |

Figure S5 UV spectrum of penicimenolide A (**1**) in MeOH

## Single Mass Analysis

Tolerance = 5.0 PPM / DBE: min = -1.5, max = 30.0

Element prediction: Off

Number of isotope peaks used for i-FIT = 3

Monoisotopic Mass, Even Electron Ions

276 formula(e) evaluated with 1 results within limits (up to 20 closest results for each mass)

Elements Used:

C: 0-100 H: 0-200 N: 0-2 O: 0-100 Na: 0-1

565-3-1

2015090410 146 (1.182)

1: TOF MS ES+  
1.92e+005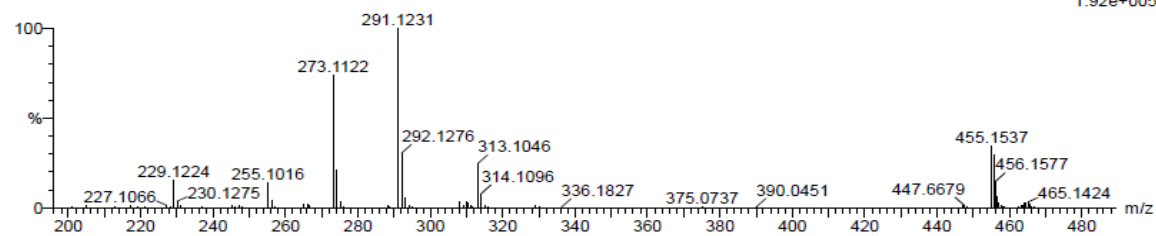

Minimum: -1.5  
Maximum: 30.0

| Mass     | Calc. Mass | mDa  | PPM  | DBE | i-FIT | Norm | Conf (%) | Formula    |
|----------|------------|------|------|-----|-------|------|----------|------------|
| 291.1231 | 291.1232   | -0.1 | -0.3 | 7.5 | 339.2 | n/a  | n/a      | C16 H19 O5 |

Figure S6 HR-ESI-MS spectrum of penicimenolide A (**1**)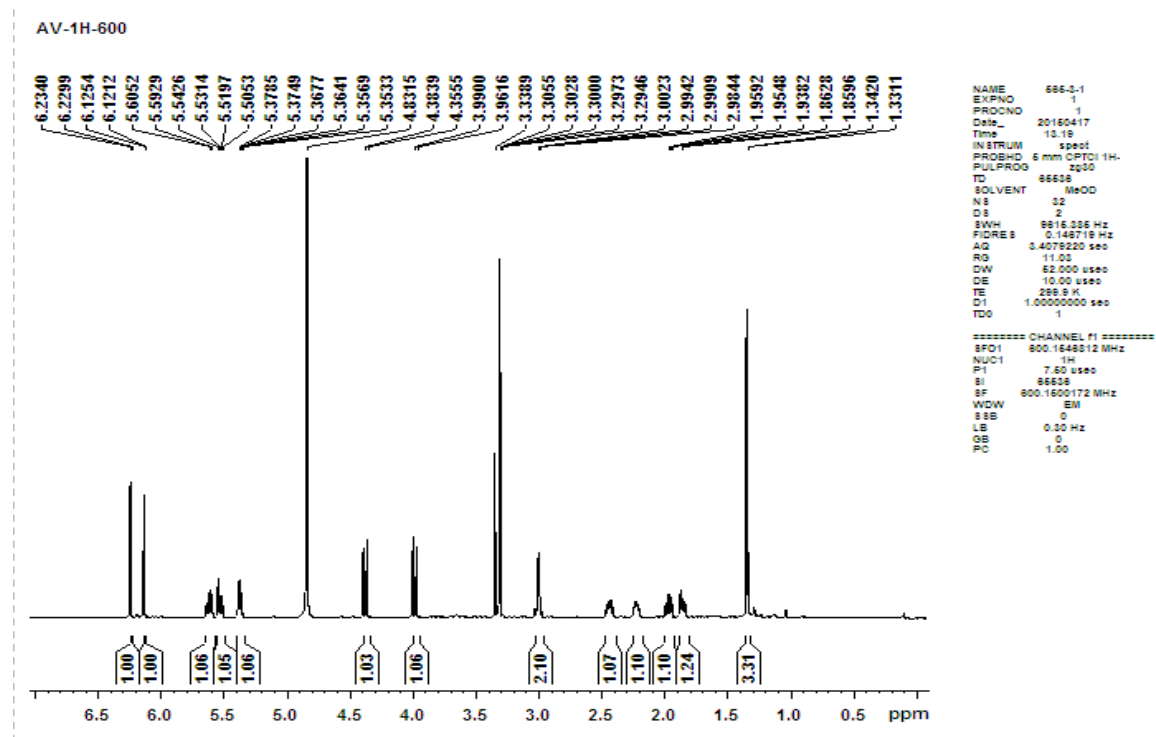Figure S7 <sup>1</sup>H-NMR spectrum of **1** (600MHz, in CD<sub>3</sub>OD)

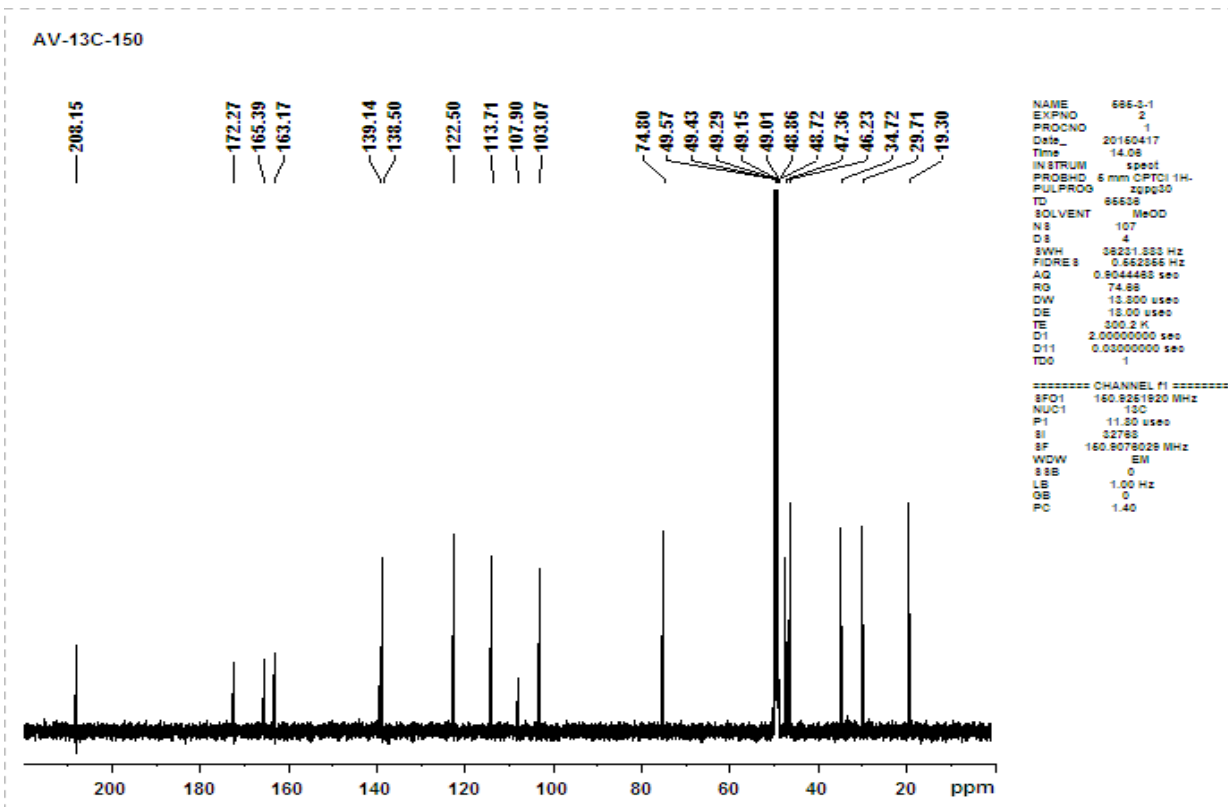

Figure S8  $^{13}\text{C}$ -NMR spectrum of **1** (150MHz, in  $\text{CD}_3\text{OD}$ )

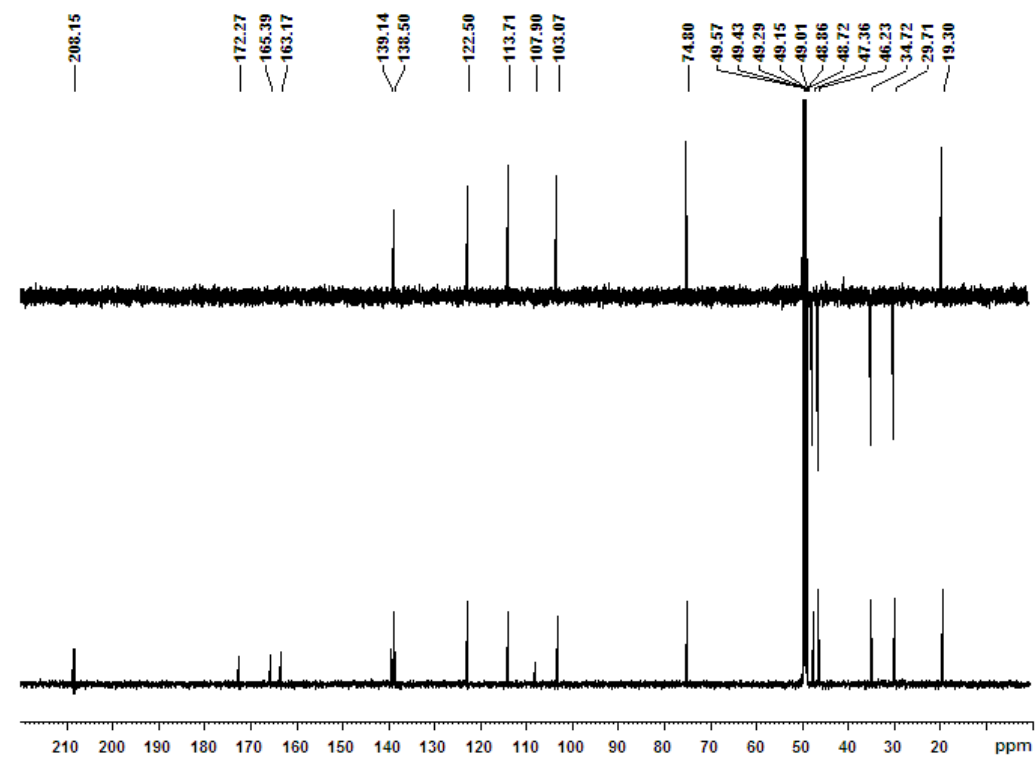

Figure S9  $^{13}\text{C}$ -NMR and DEPT 135 spectra of **1** (150MHz, in  $\text{CD}_3\text{OD}$ )

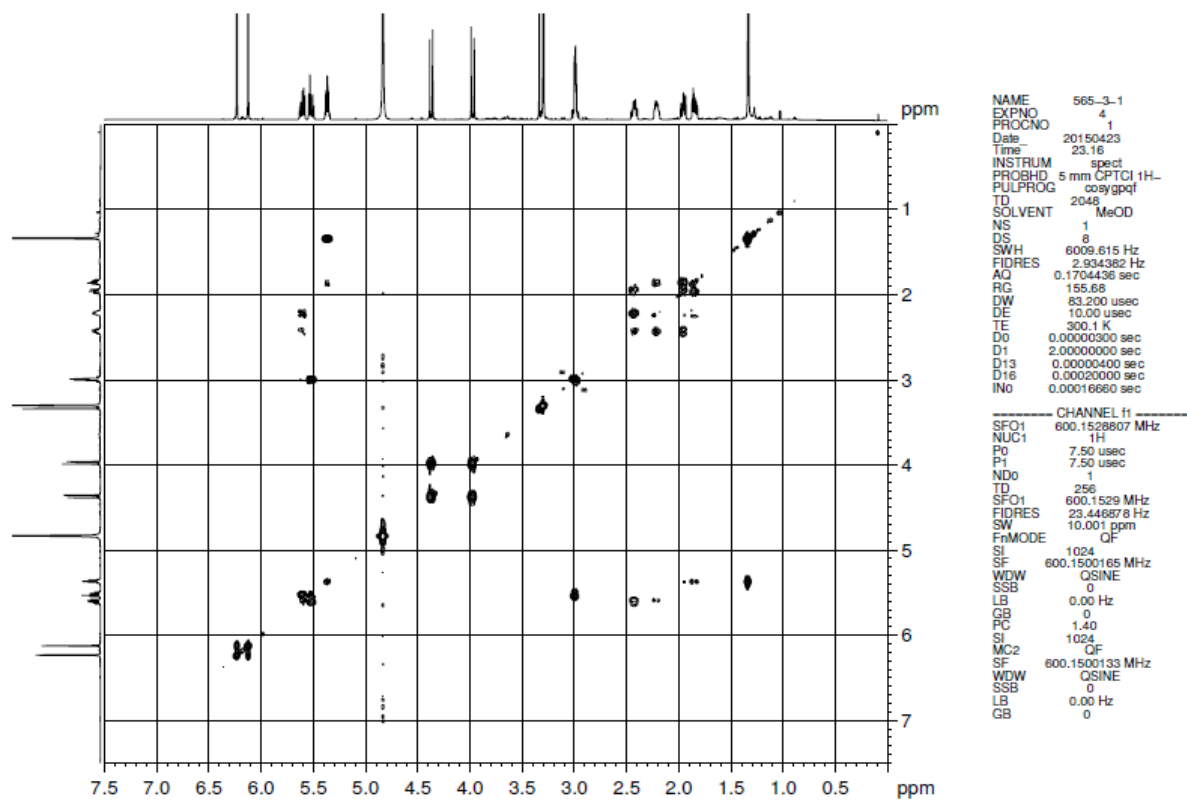

Figure S10  $^1\text{H}$ - $^1\text{H}$  COSY spectrum of **1** (600MHz, in  $\text{CD}_3\text{OD}$ )

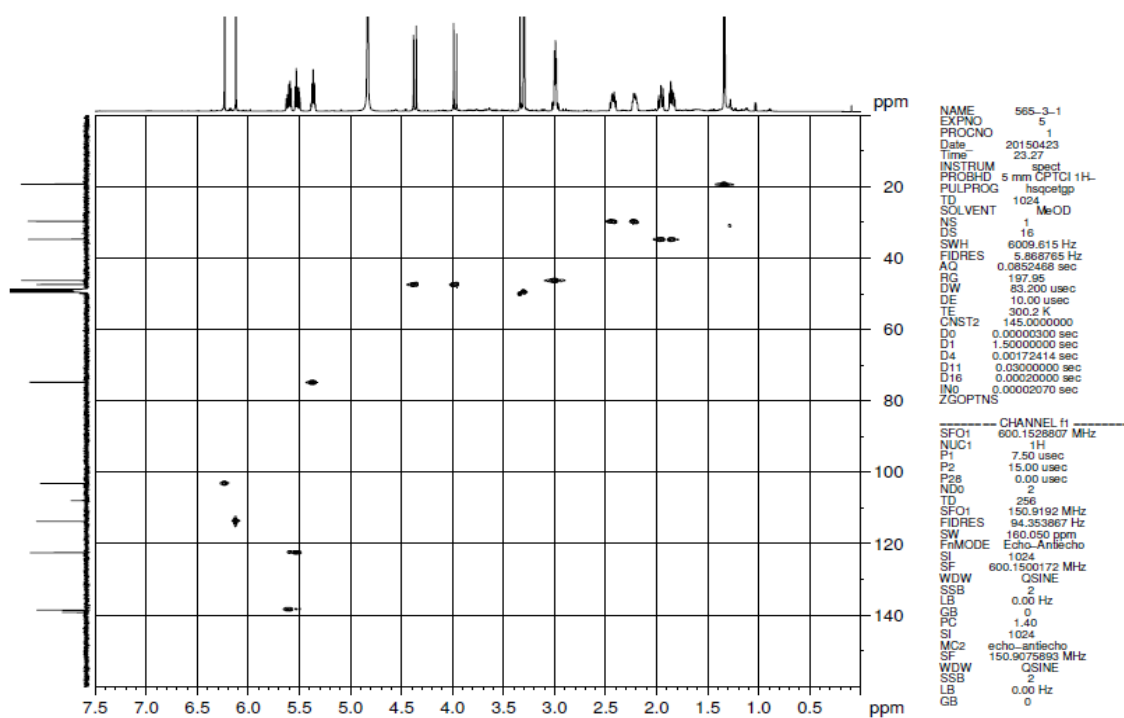

Figure S11 HSQC spectrum of **1** (600MHz, in  $\text{CD}_3\text{OD}$ )

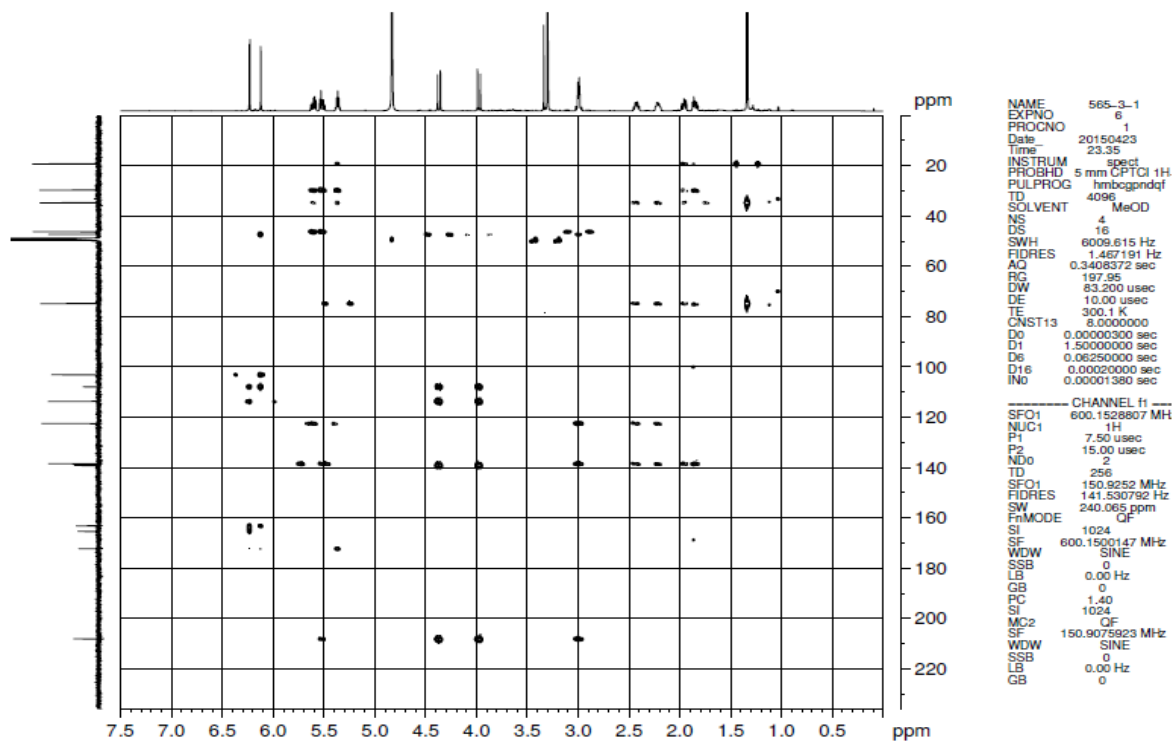

Figure S12 HMBC spectrum of **1** (600MHz, in CD<sub>3</sub>OD)

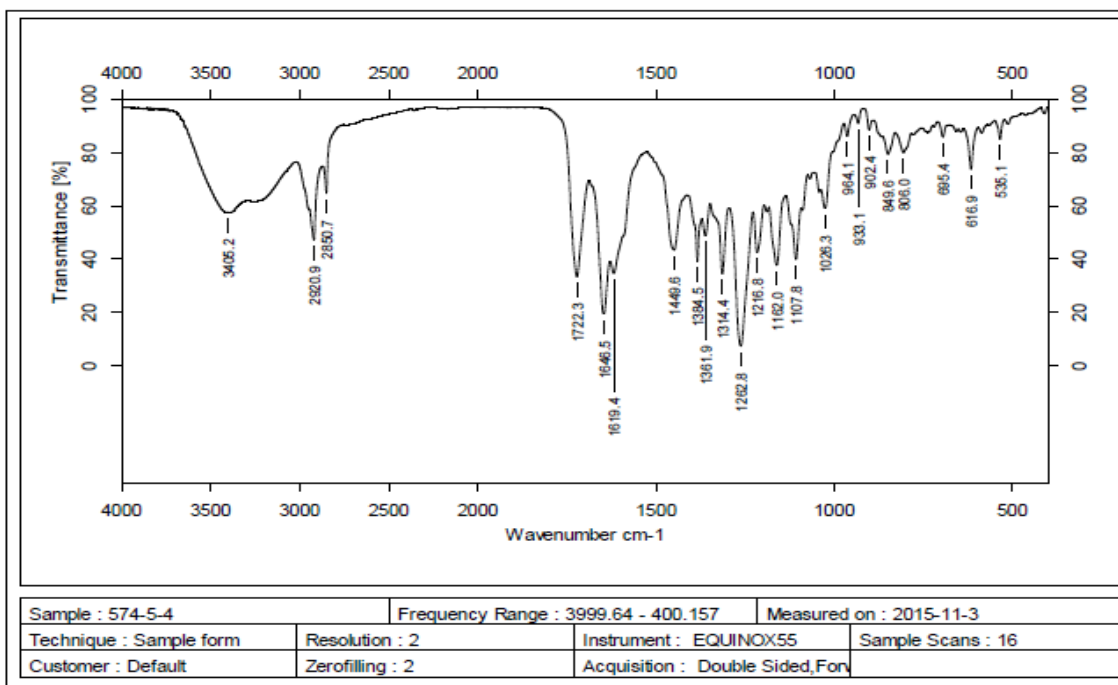

Figure S13 IR (KBr disc) spectrum of penicimenolide B (**2**)



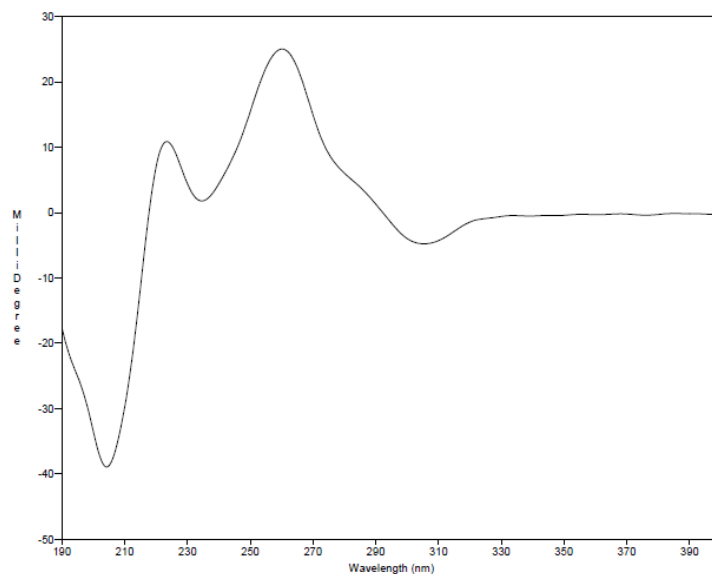

Figure S14 CD spectrum of penicimenolide B (**2**) in MeOH

## Spectrum Peak Pick Report

FIELD FIELD TEXT

Data Set: 没有

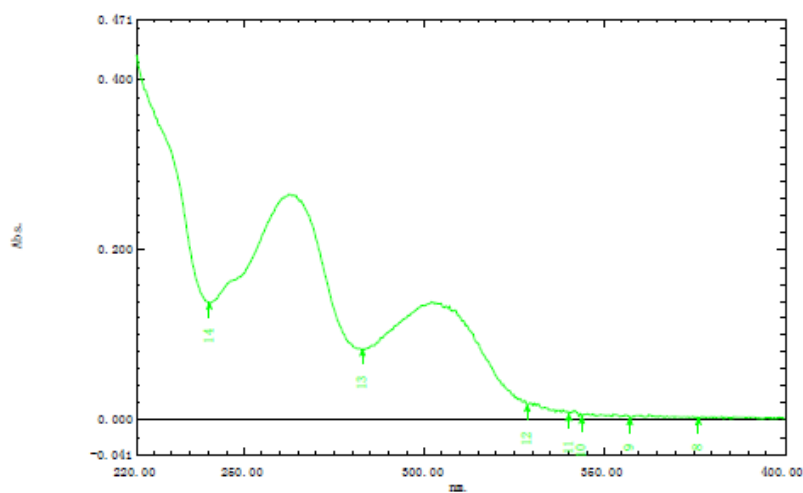

测定属性  
 波长范围 (nm): 220.00到400.00  
 扫描速度: 高速  
 采样间隔: 0.2  
 自动采样间隔: 启用  
 扫描模式: 单一的

试样准备属性  
 重量: 0.5  
 体积: 10  
 稀释: 稀释  
 光程长: 407  
 附加信息:

仪器属性  
 仪器类型: UV-1700  
 测定方式: 吸收值  
 狭缝宽: 1.0 nm  
 光源改变波长: 340.8 nm  
 s/n 转换: 标准

| No. | P/V | Wavelength | Abs. | 描述 |
|-----|-----|------------|------|----|
| 1   | ●   | 382.80     | .004 |    |
| 2   | ●   | 362.80     | .006 |    |
| 3   | ●   | 352.60     | .008 |    |
| 4   | ●   | 341.80     | .011 |    |
| 5   | ●   | 329.40     | .020 |    |
| 6   | ●   | 302.00     | .139 |    |
| 7   | ●   | 262.40     | .266 |    |
| 8   | ●   | 376.20     | .003 |    |
| 9   | ●   | 357.20     | .003 |    |
| 10  | ●   | 343.80     | .004 |    |
| 11  | ●   | 340.20     | .007 |    |
| 12  | ●   | 328.60     | .018 |    |
| 13  | ●   | 282.60     | .083 |    |
| 14  | ●   | 240.20     | .137 |    |

Figure S15 UV spectrum of penicimenolide B (**2**) in MeOH

## Single Mass Analysis

Tolerance = 5.0 mDa / DBE: min = -1.5, max = 50.0

Element prediction: Off

Number of isotope peaks used for i-FIT = 3

Monoisotopic Mass, Even Electron Ions

72 formula(e) evaluated with 2 results within limits (up to 10 best isotopic matches for each mass)

Elements Used:

C: 0-500 H: 0-1000 O: 0-200

574-5-4

2015033009 152 (1.238)

1: TOF MS ES+  
3.00e+005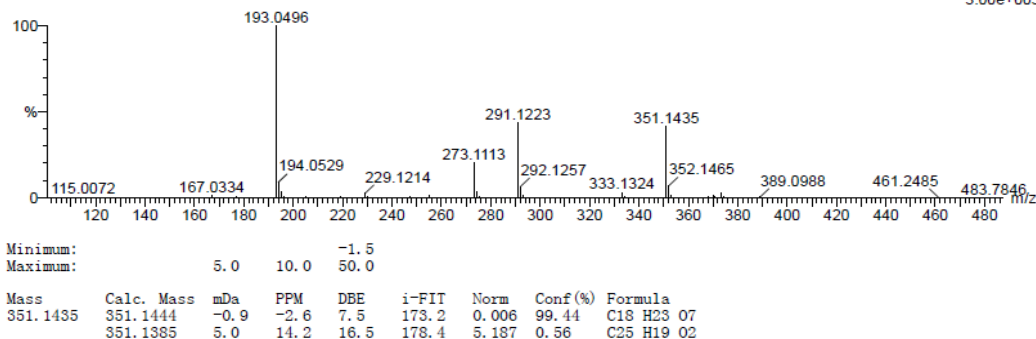

Figure S16 HR-ESI-MS spectrum of penicimenolide B (2)

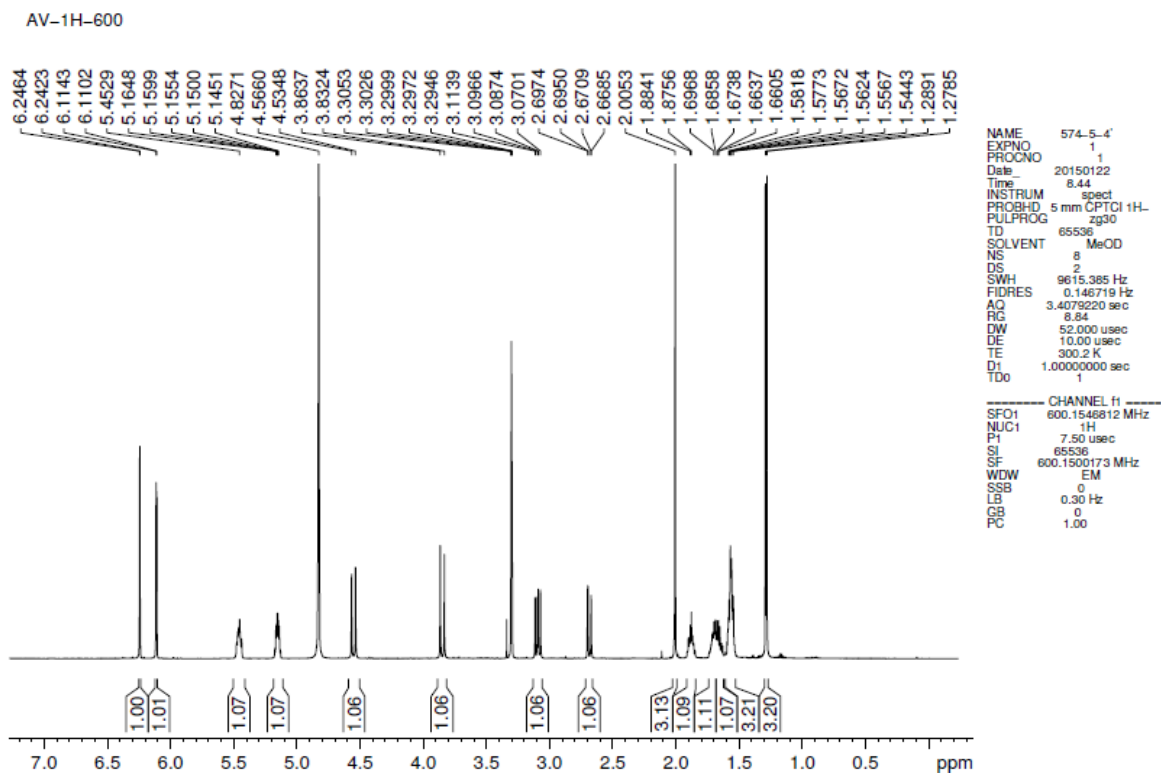Figure S17 <sup>1</sup>H-NMR spectrum of 2 (600MHz, in CD<sub>3</sub>OD)

AV-13C-150

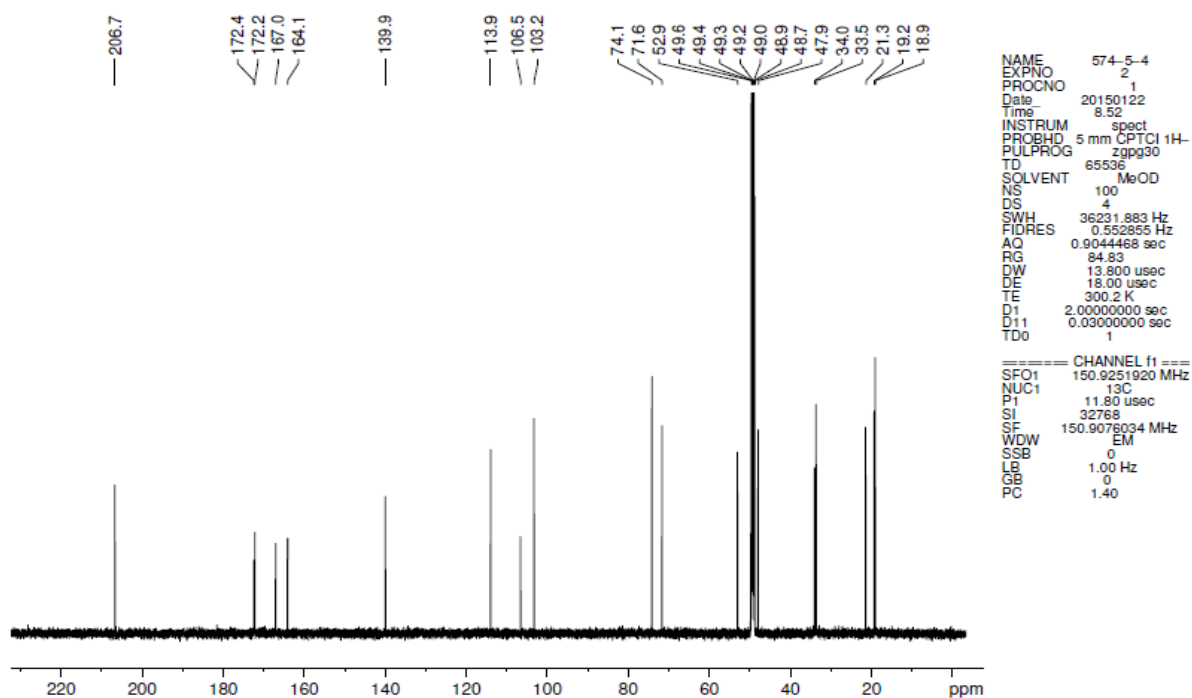

Figure S18  $^{13}\text{C}$ -NMR spectrum of **2** (150MHz, in  $\text{CD}_3\text{OD}$ )

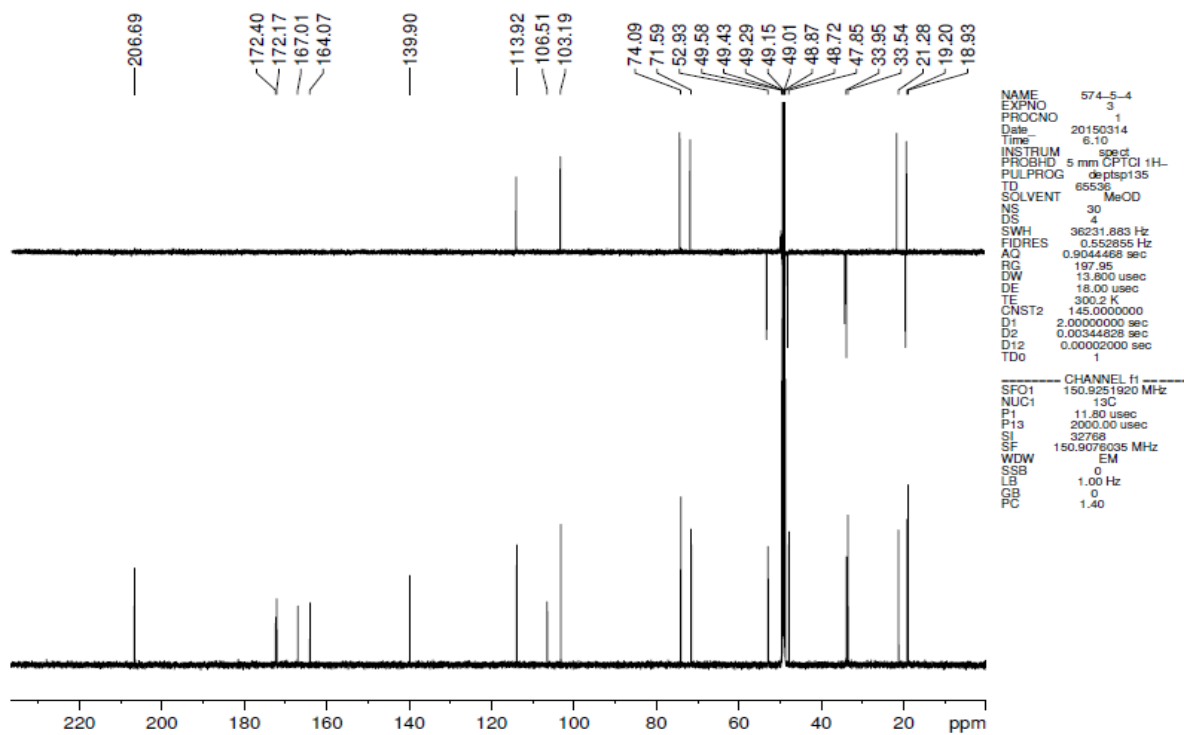

Figure S19  $^{13}\text{C}$ -NMR and DEPT 135 spectra of **2** (150MHz, in  $\text{CD}_3\text{OD}$ )

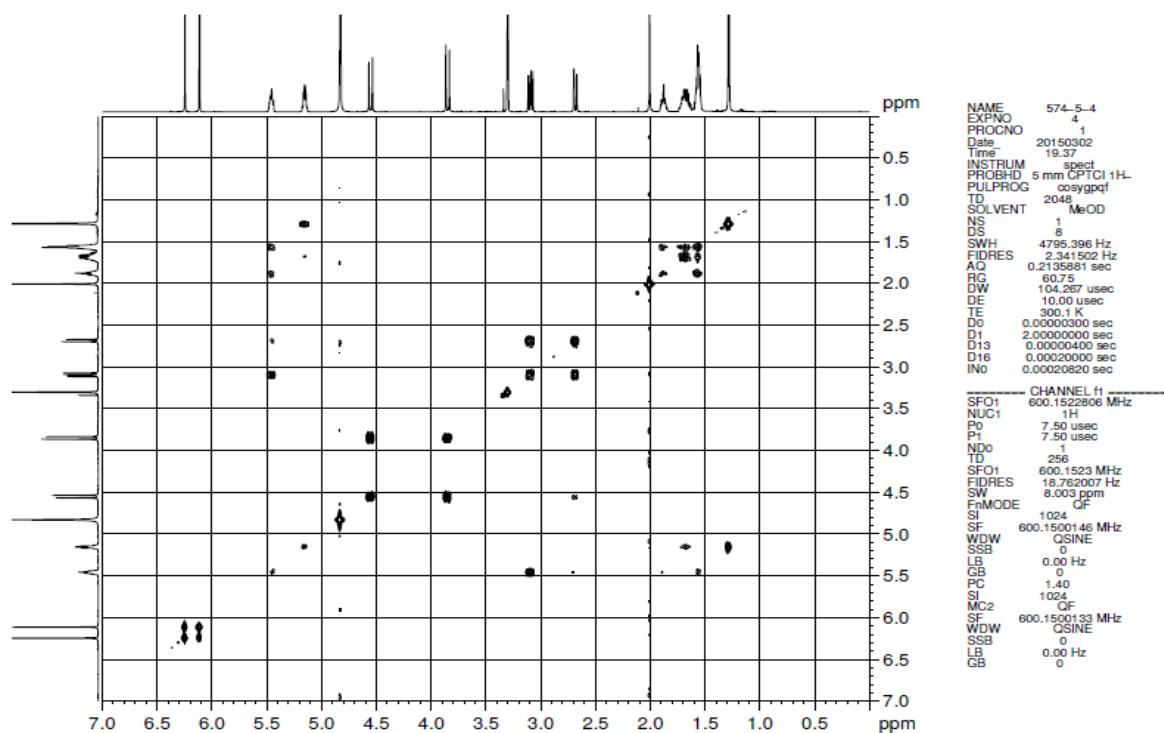

Figure S20  $^1\text{H}$ - $^1\text{H}$  COSY spectrum of **2** (600MHz, in  $\text{CD}_3\text{OD}$ )

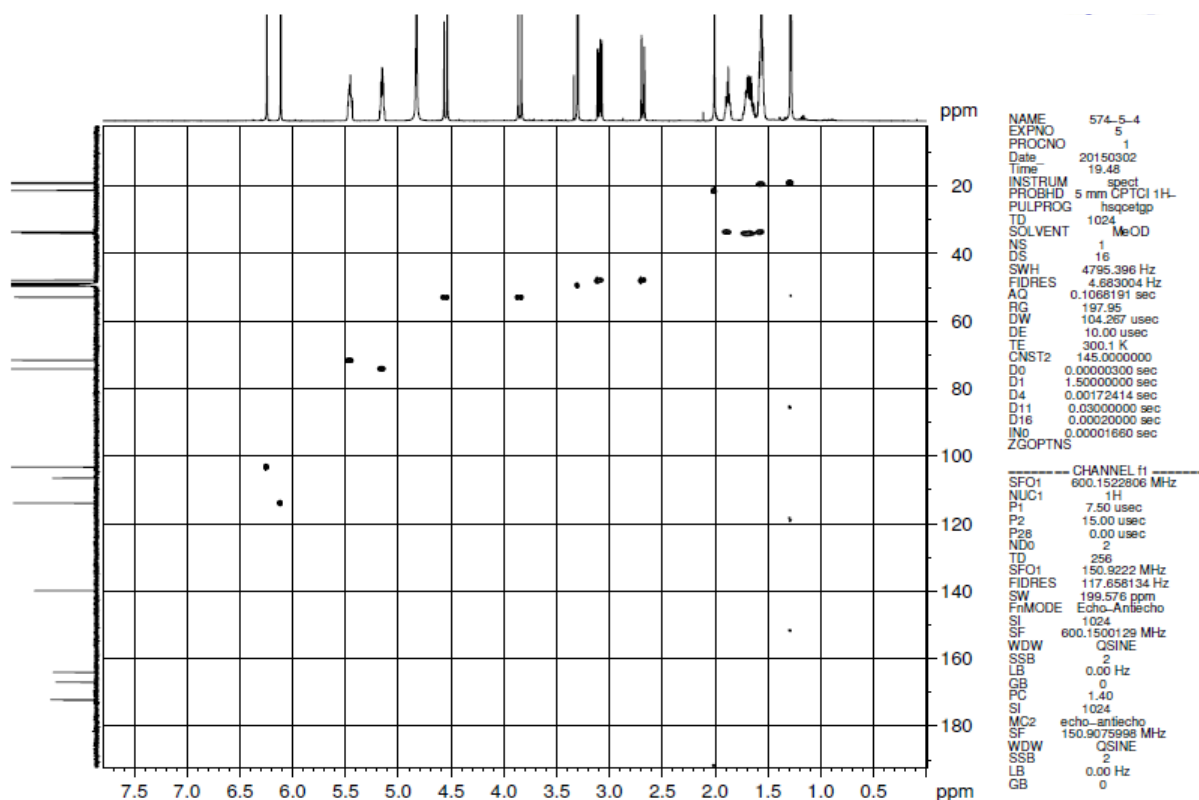

Figure S21 HSQC spectrum of **2** (600MHz, in  $\text{CD}_3\text{OD}$ )

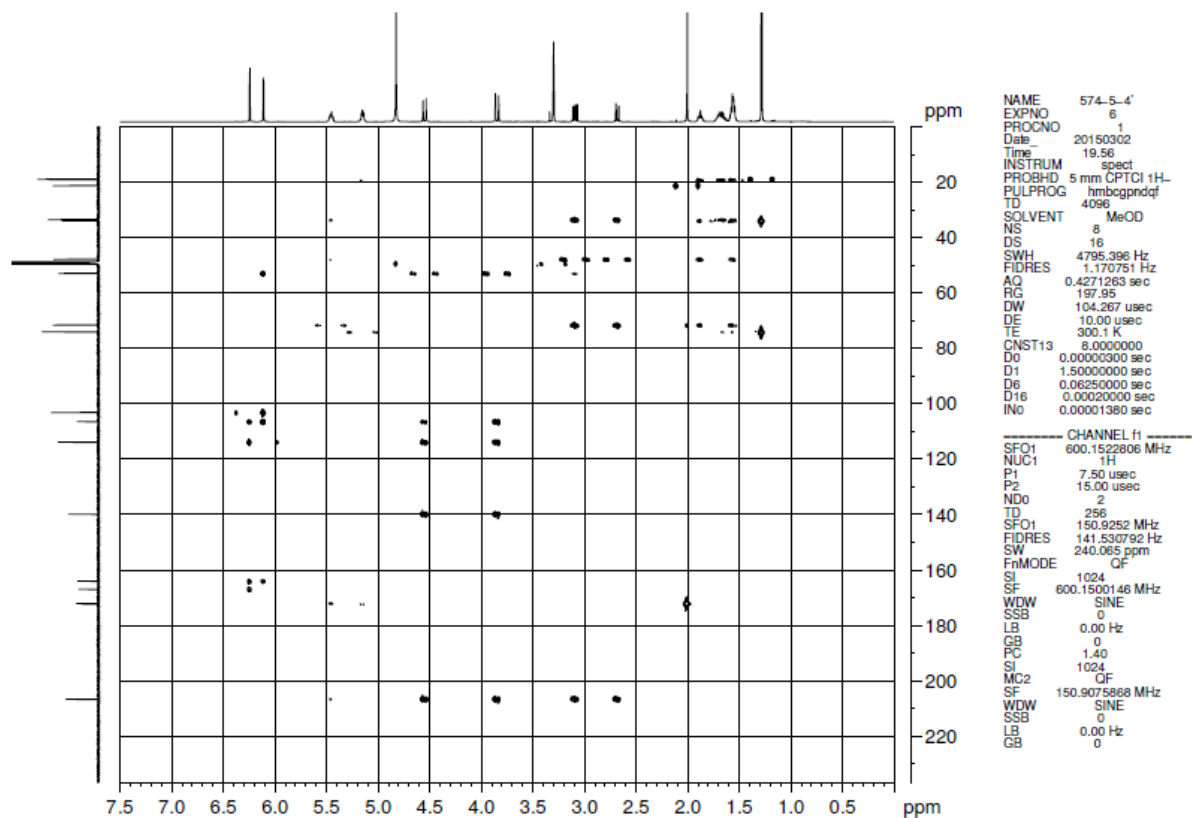

Figure S22 HMBC spectrum of **2** (600MHz, in CD)

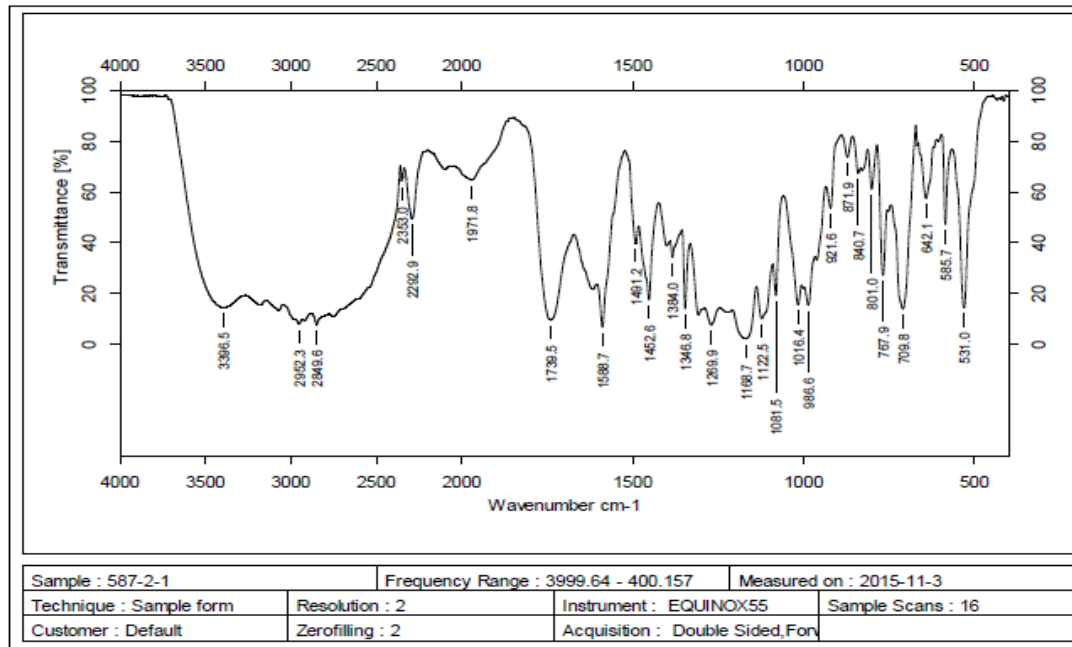

Figure S23 IR (KBr disc) spectrum of penicimenolide C (**3**)

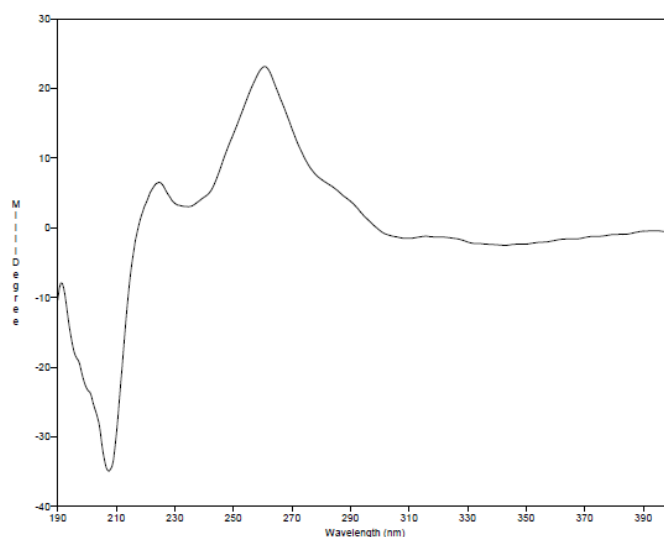

Figure S24 CD spectrum of penicimenolide C (**3**) in MeOH

## Spectrum Peak Pick Report

FIELD FIELD TEXT

Data Set: 没有

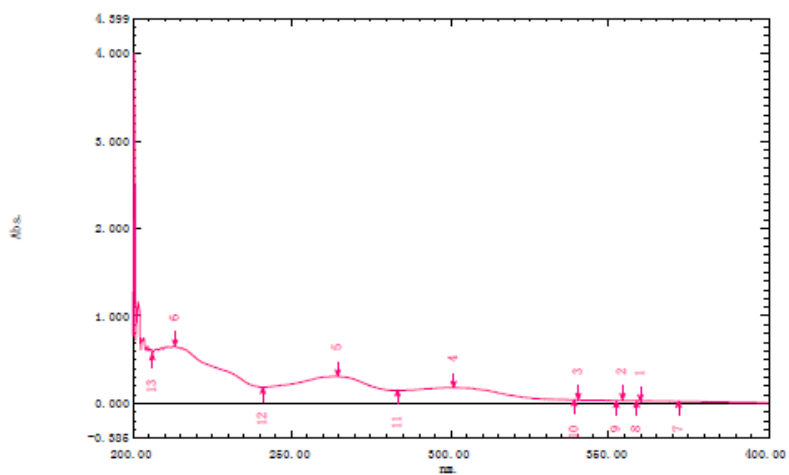

测定属性  
 波长范围 (nm.): 200.00到400.00  
 扫描速度: 高速  
 采样间隔: 0.2  
 自动采样间隔: 停用  
 扫描模式: 单一的

试样准备属性

重量: 0.3  
 体积: 10  
 稀释: 407

附加信息:

仪器属性

仪器类型: UV-1700  
 测定方式: 吸收值  
 狭缝宽: 1.0 nm  
 光源改变波长: 540.0 nm  
 c/m 转换: 标准

附件属性

附件: 无

| No. | P/V | Wavelength | Abs. | 描述 |
|-----|-----|------------|------|----|
| 1   | ●   | 359.80     | .035 |    |
| 2   | ●   | 354.40     | .037 |    |
| 3   | ●   | 340.40     | .045 |    |
| 4   | ●   | 301.00     | .186 |    |
| 5   | ●   | 264.60     | .314 |    |
| 6   | ●   | 213.20     | .658 |    |
| 7   | ●   | 372.00     | .026 |    |
| 8   | ●   | 358.80     | .033 |    |
| 9   | ●   | 352.20     | .034 |    |
| 10  | ●   | 339.20     | .042 |    |
| 11  | ●   | 283.20     | .152 |    |
| 12  | ●   | 241.00     | .169 |    |
| 13  | ●   | 206.20     | .577 |    |

Figure S25 UV spectrum of penicimenolide C (**3**) in MeOH

## Single Mass Analysis

Tolerance = 5.0 PPM / DBE: min = -1.5, max = 30.0

Element prediction: Off

Number of isotope peaks used for i-FIT = 3

Monoisotopic Mass, Even Electron Ions

304 formula(e) evaluated with 1 results within limits (up to 20 closest results for each mass)

Elements Used:

C: 0-50 H: 0-100 N: 0-3 O: 0-30

587-2-1

20150617-06 132 (1.077) Cm (131:133)

1: TOF MS ES+  
4.58e+005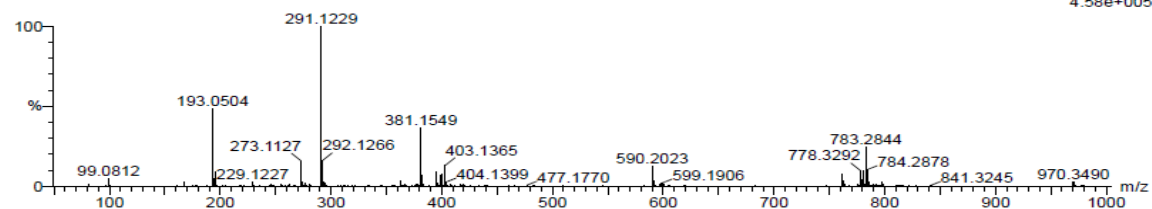

Minimum: -1.5  
Maximum: 30.0

| Mass     | Calc. Mass | mDa | PPM | DBE | i-FIT | Norm | Conf(%) | Formula    |
|----------|------------|-----|-----|-----|-------|------|---------|------------|
| 381.1549 | 381.1549   | 0.0 | 0.0 | 7.5 | 358.7 | n/a  | n/a     | C19 H25 O8 |

Figure S26 HR-ESI-MS spectrum of penicimenolide C (3)

AV-1H-600

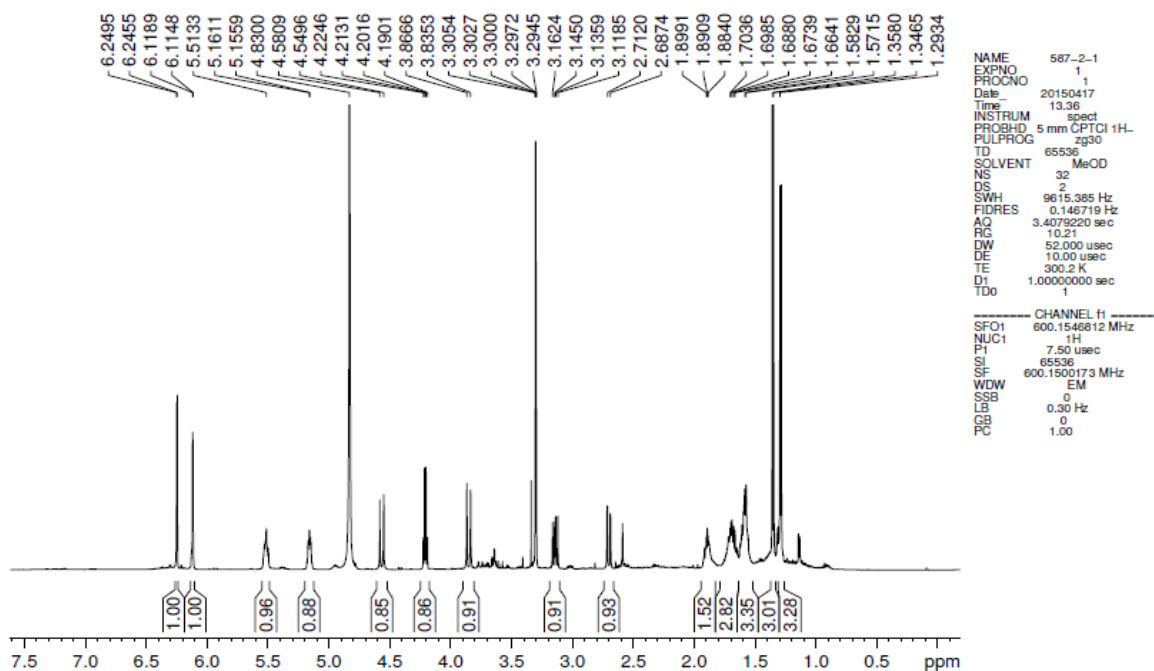

NAME 587-2-1  
EXPNO 1  
PROCNO 1  
Date\_ 20150417  
Time 13.36  
INSTRUM spect  
PROBHD 5 mm CPTCI 1H-  
PULPROG zg30  
TD 65536  
SOLVENT MeOD  
NS 32  
DS 2  
SWH 9615.385 Hz  
FIDRES 0.146719 Hz  
AQ 3.4079220 sec  
RG 10.21  
DW 52.000 usec  
DE 10.00 usec  
TE 300.2 K  
D1 1.00000000 sec  
TD0 1

CHANNEL f1  
SFO1 600.1546812 MHz  
NUC1 1H  
P1 7.50 usec  
SI 65536  
SF 600.1500173 MHz  
WDW EM  
SSB 0  
LB 0.30 Hz  
GB 0  
PC 1.00

Figure S27 <sup>1</sup>H-NMR spectrum of 3 (600MHz, in CD<sub>3</sub>OD)

AV-13C-150

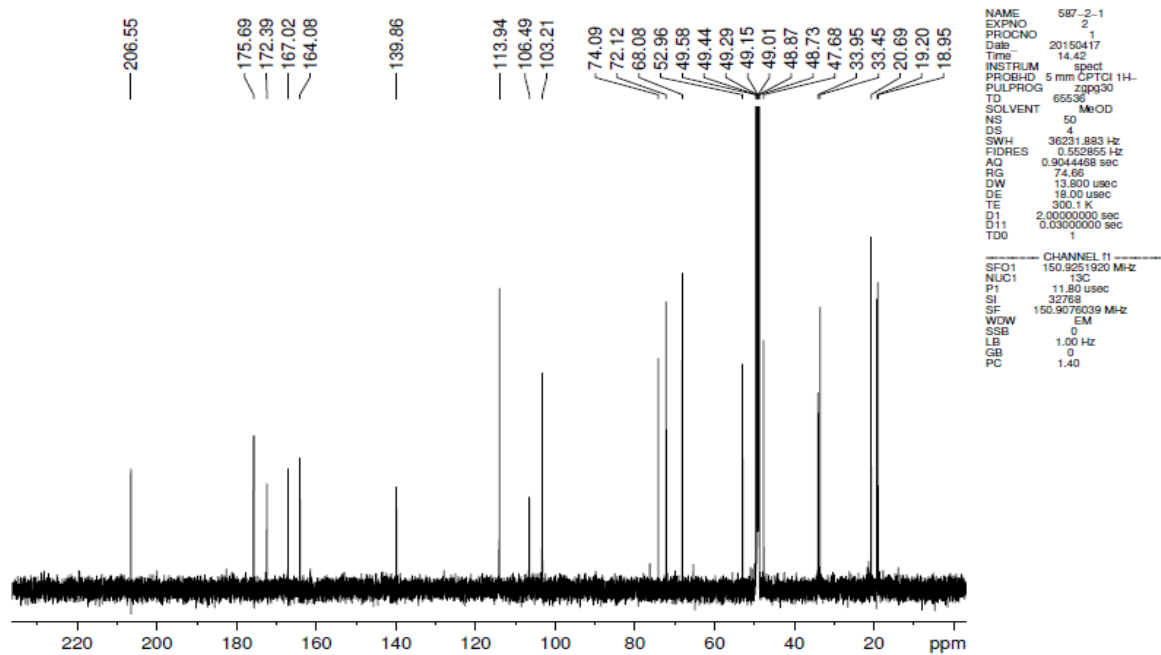

Figure S28 <sup>13</sup>C-NMR spectrum of **3** (150MHz, in CD<sub>3</sub>OD)

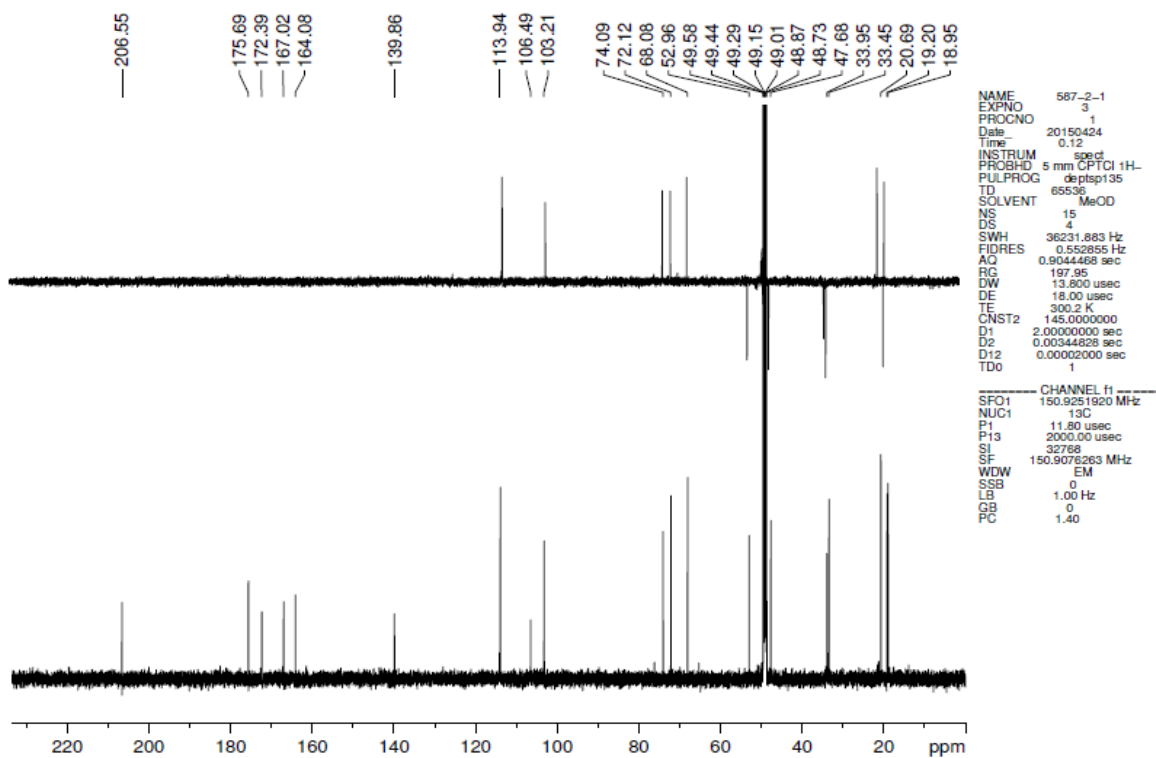

Figure S29 <sup>13</sup>C-NMR and DEPT 135 spectra of **3** (150MHz, in CD<sub>3</sub>OD)



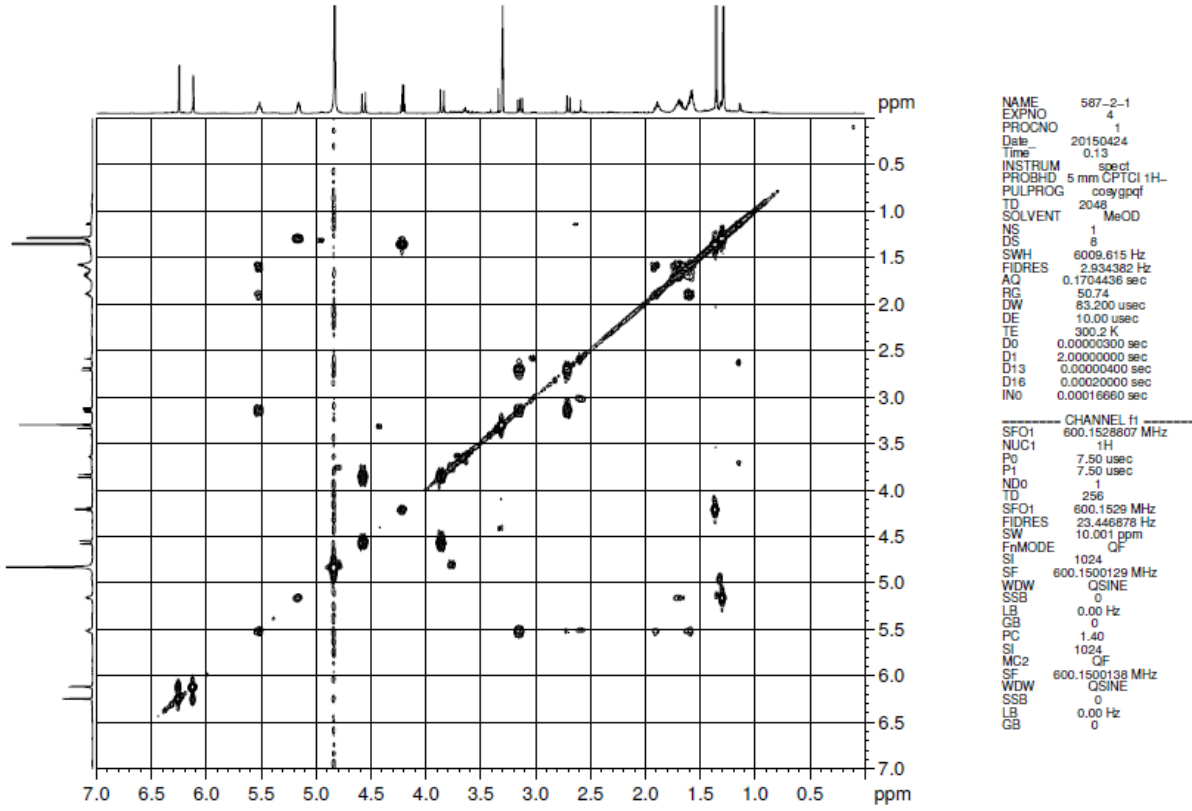

Figure S30  $^1\text{H}$ - $^1\text{H}$  COSY spectrum of **3** (600MHz, in  $\text{CD}_3\text{OD}$ )

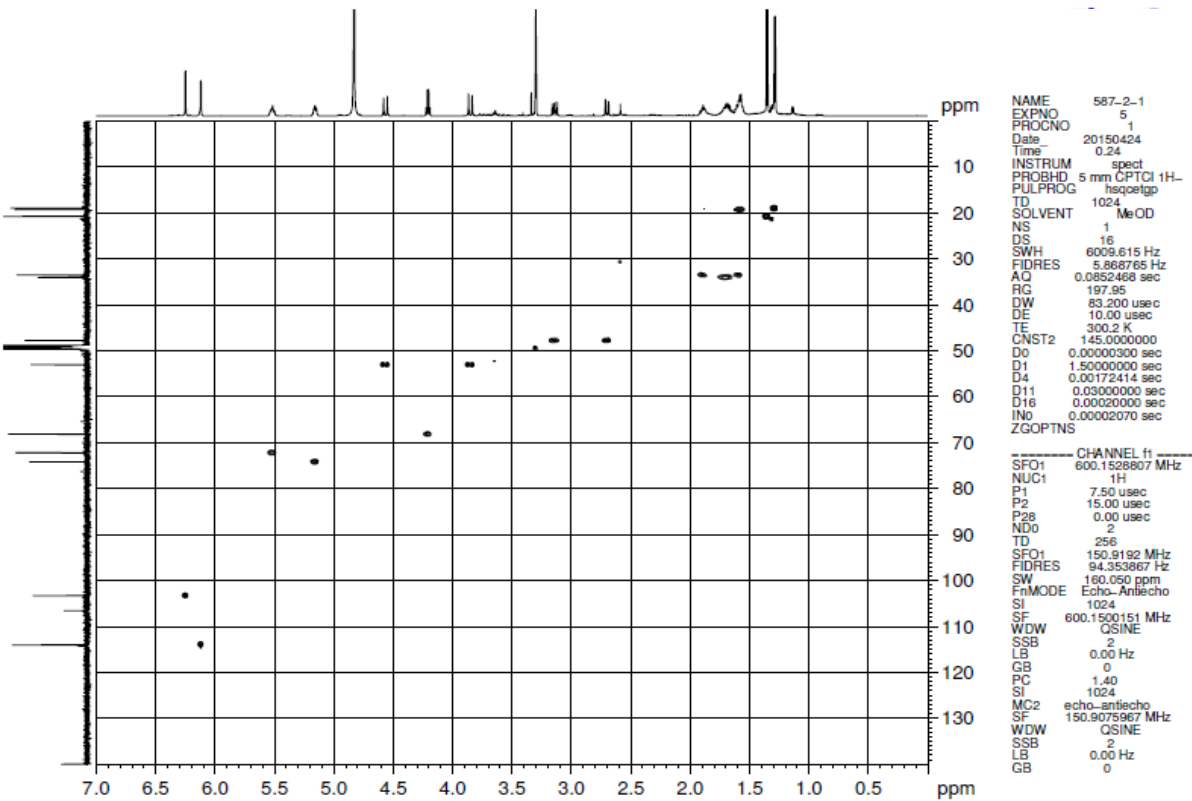

Figure S31 HSQC spectrum of **3** (600MHz, in  $\text{CD}_3\text{OD}$ )

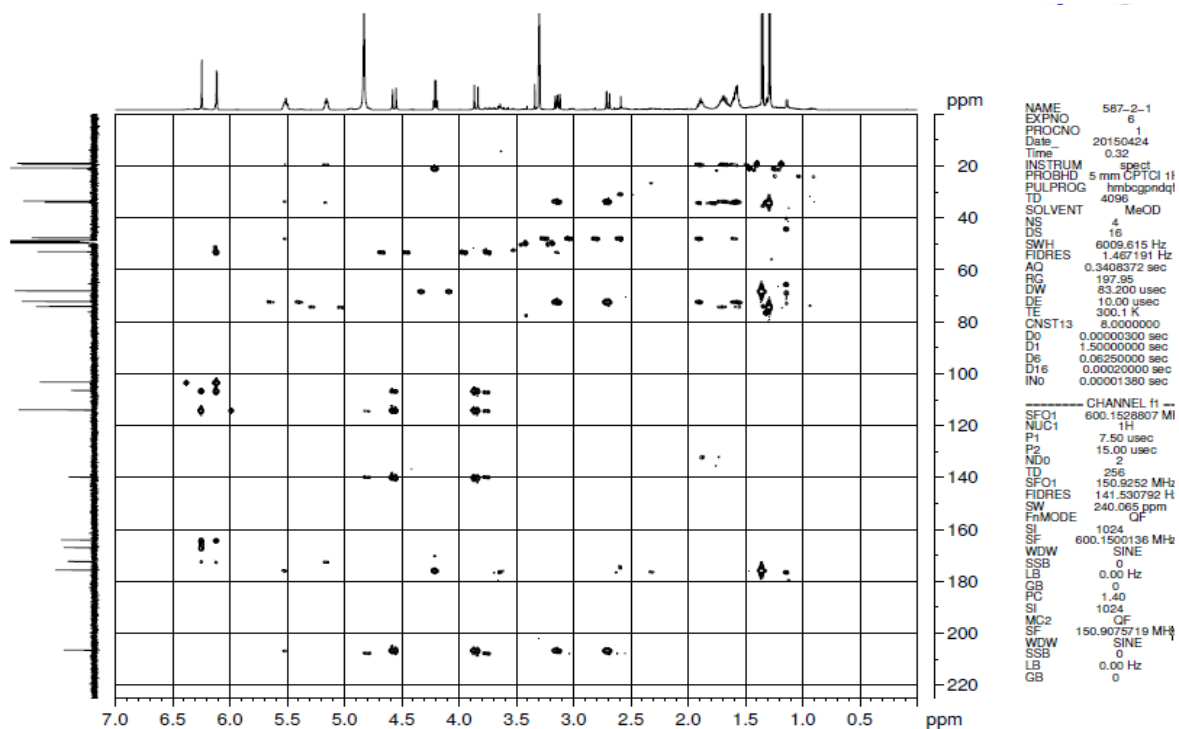

Figure S32 HMBNMR spectrum of **3** (600MHz, in CD<sub>3</sub>OD)

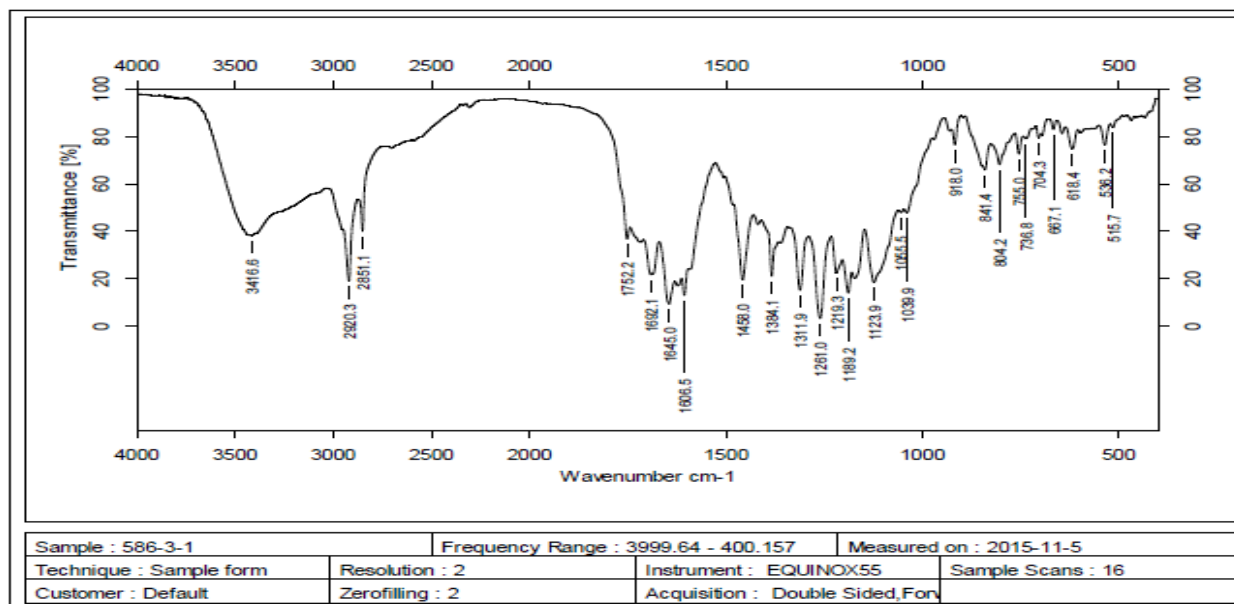

Figure S33 IR (KBr disc) spectrum of penicimenolide D (**4**)

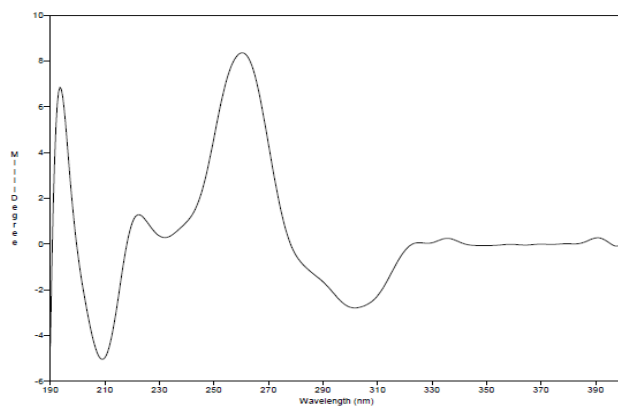

Figure S34 CD spectrum of penicimenolide D (**4**) in MeOH

### Spectrum Peak Pick Report

FIELD FIELD TEXT

Data Set: 没有

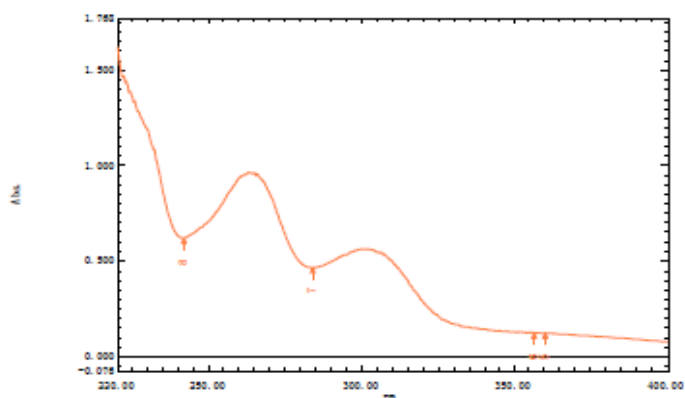

测定属性  
 波长范围 (nm): 220.00到400.00  
 扫描速度: 快速  
 采样间隔: 0.2  
 自动采样间隔: 关闭  
 扫描模式: 单一的  
 试样准备属性  
 重量: 0.3  
 体积: 10  
 稀释:   
 光程长: 407  
 附加信息:  
 仪器属性  
 仪器类型: UV-1700  
 测定方式: 吸收值  
 狭缝宽: 1.0 nm  
 光源改变波长: 140.0 nm  
 2/λ 转换: 标准  
 附件属性  
 附件: 无

| No. | P/V | Wavelength | Abs.  | 描述 |
|-----|-----|------------|-------|----|
| 1   | ●   | 257.80     | 1.24  |    |
| 2   | ●   | 307.80     | 0.28  |    |
| 3   | ●   | 307.80     | 0.83  |    |
| 4   | ●   | 264.80     | 0.81  |    |
| 5   | ●   | 360.00     | 0.120 |    |
| 6   | ●   | 356.20     | 0.124 |    |
| 7   | ●   | 283.80     | 0.481 |    |
| 8   | ●   | 241.60     | 0.817 |    |

FIELD TEXT

Figure S35 UV spectrum of penicimenolide D (**4**) in MeOH

### Single Mass Analysis

Tolerance = 5.0 PPM / DBE: min = -1.5, max = 30.0

Element prediction: Off

Number of isotope peaks used for i-FIT = 3

Monoisotopic Mass, Even Electron Ions

304 formula(e) evaluated with 1 results within limits (up to 20 closest results for each mass)

Elements Used:

C: 0-50 H: 0-100 N: 0-3 O: 0-30

586-3-1

20150617-08 121 (0.984) Cm (120:124)

1: TOF MS ES+  
7.19e+005

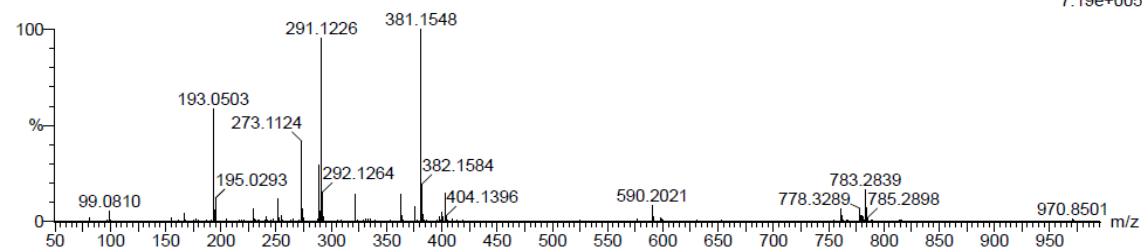

Minimum: -1.5  
Maximum: 5.0 5.0 30.0

| Mass     | Calc. Mass | mDa  | PPM  | DBE | i-FIT | Norm | Conf (%) | Formula    |
|----------|------------|------|------|-----|-------|------|----------|------------|
| 381.1548 | 381.1549   | -0.1 | -0.3 | 7.5 | 619.6 | n/a  | n/a      | C19 H25 O8 |

Figure S36 HR-ESI-MS spectrum of penicimenolide D (4)

AV-1H-600

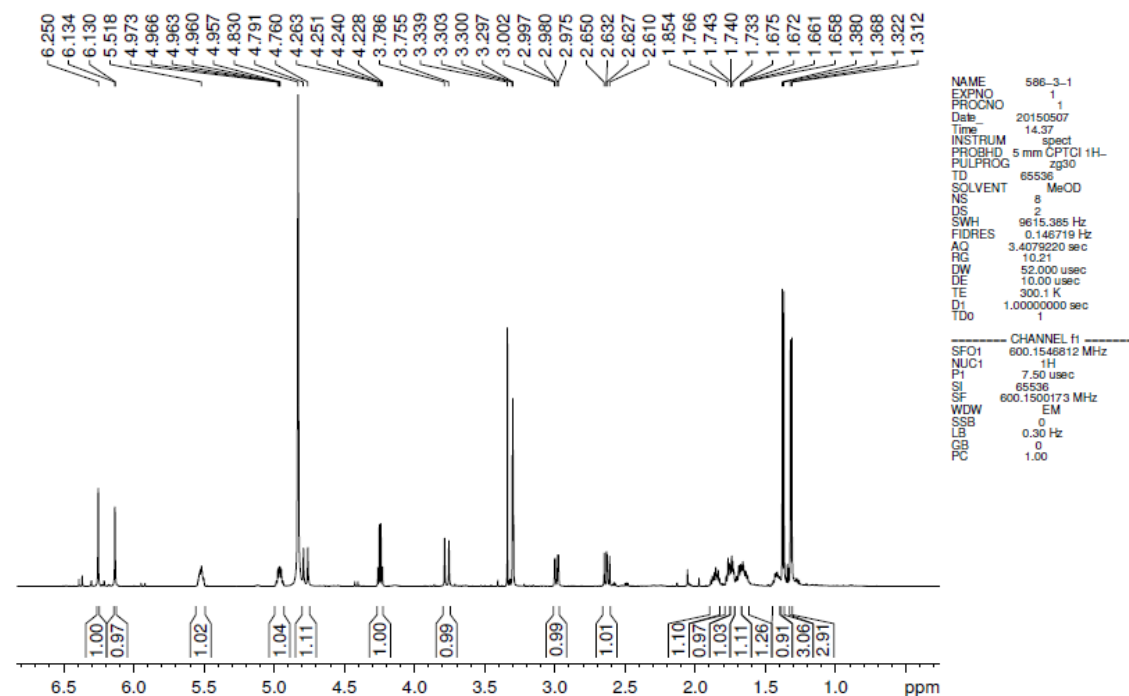

Figure S37 <sup>1</sup>H-NMR spectrum of 4 (600 MHz, in CD<sub>3</sub>OD)

AV-13C-150

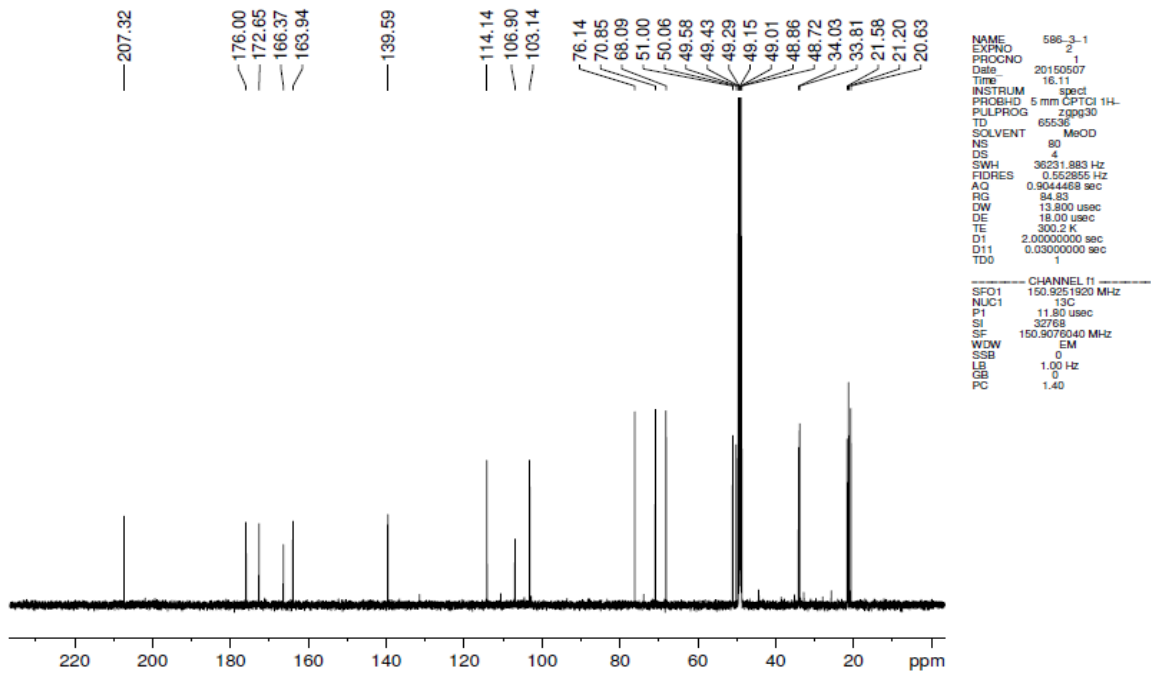

Figure S38  $^{13}\text{C}$ -NMR spectrum of **4** (150MHz, in  $\text{CD}_3\text{OD}$ )

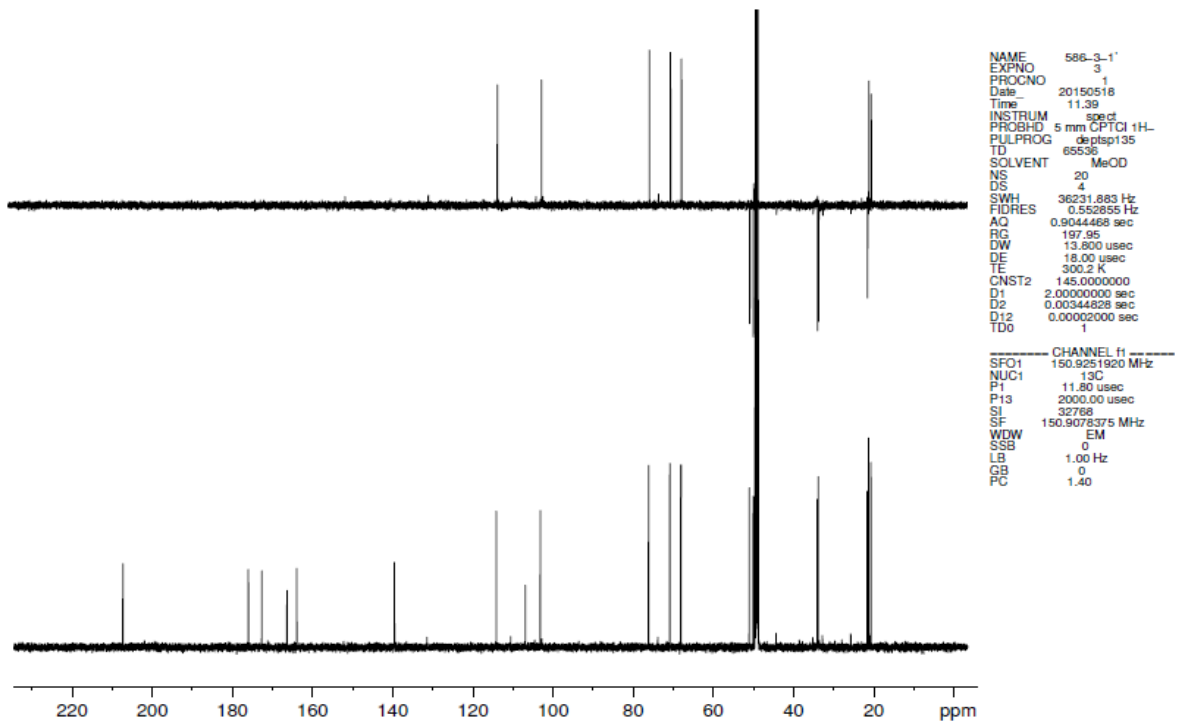

Figure S39  $^{13}\text{C}$ -NMR and DEPT 135 spectra of **4** (150MHz, in  $\text{CD}_3\text{OD}$ )

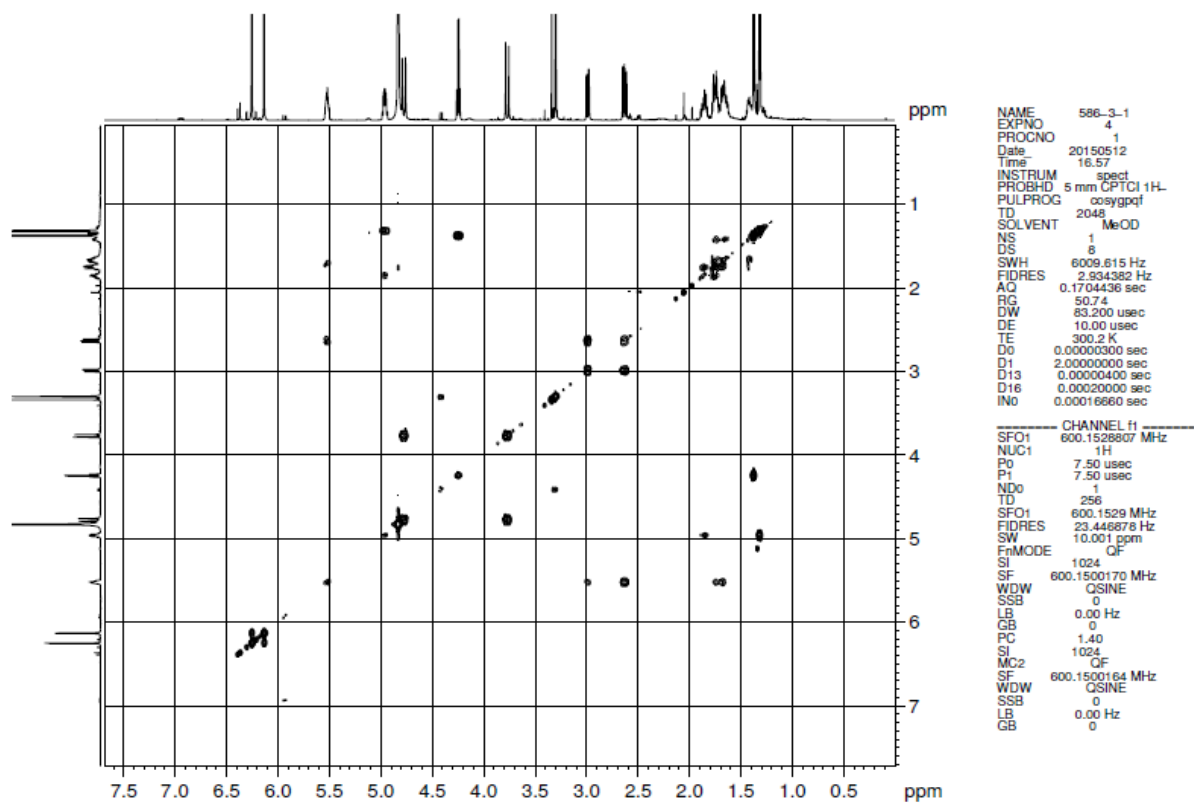

Figure S40  $^1\text{H}$ - $^1\text{H}$  COSY spectrum of **4** (600MHz, in  $\text{CD}_3\text{OD}$ )

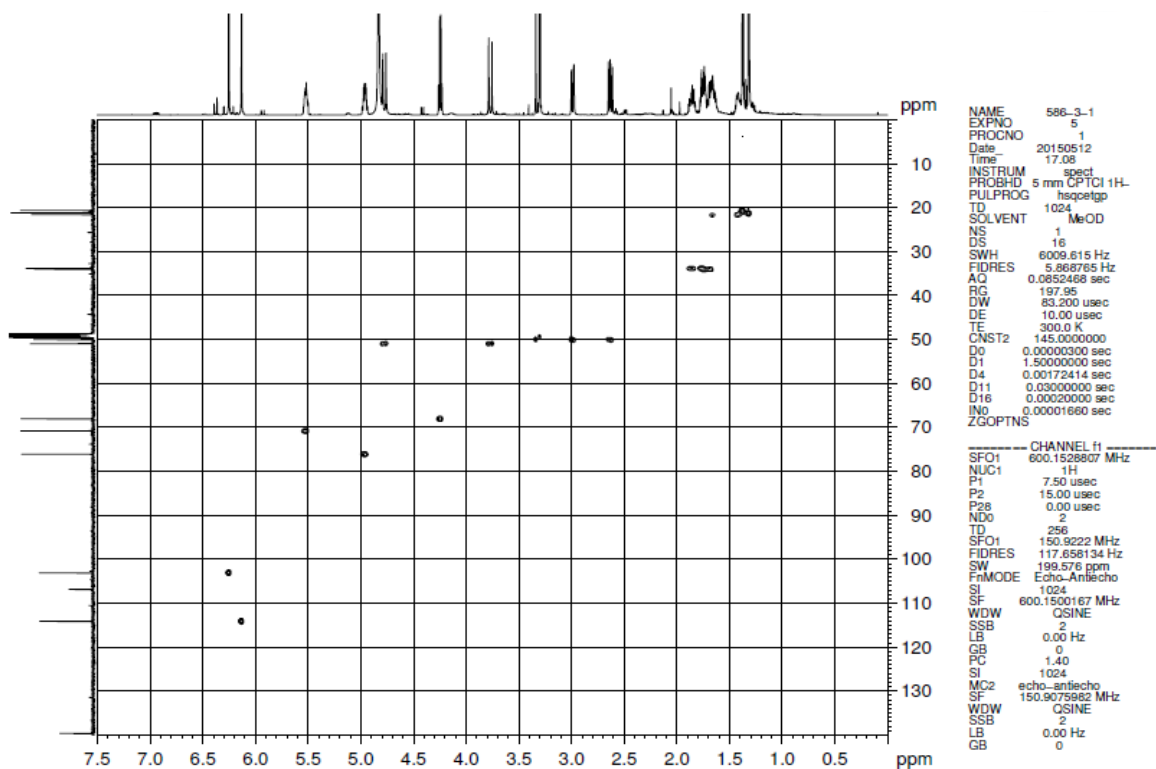

Figure S41 HSQC spectrum of **4** (600MHz, in  $\text{CD}_3\text{OD}$ )

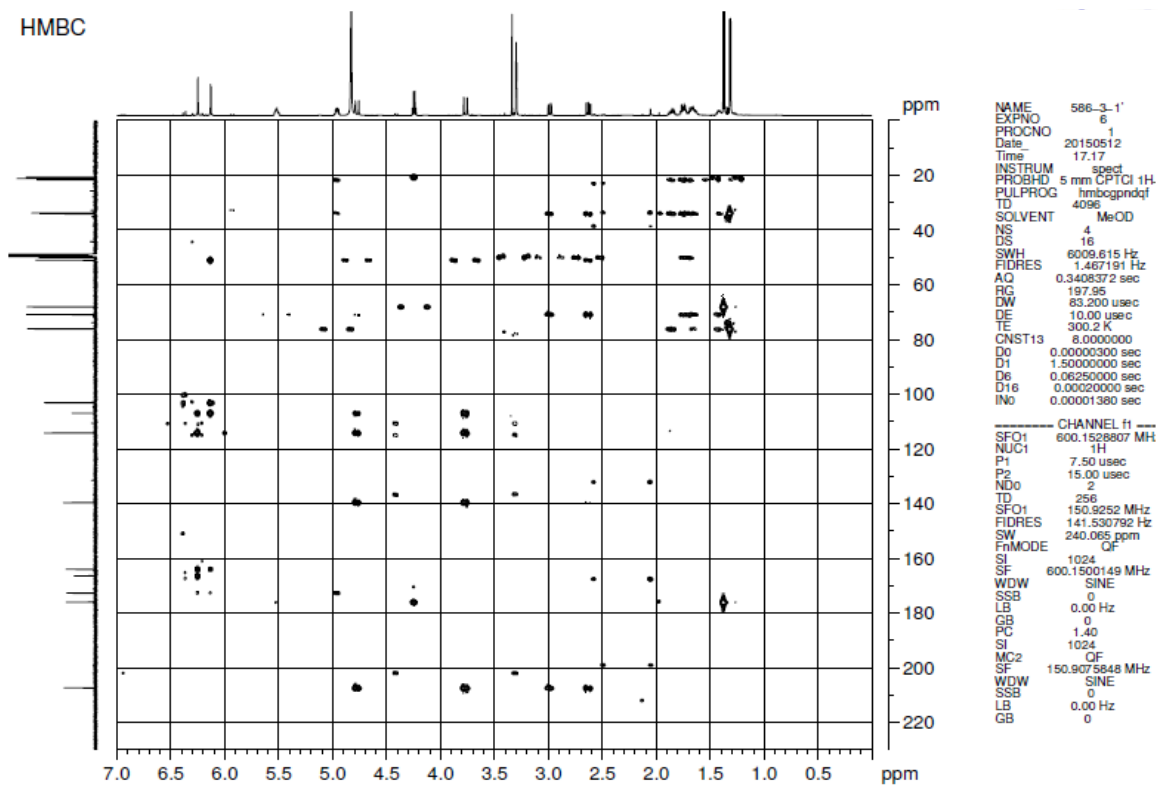

Figure S42 HMBC spectrum of **4** (600MHz, in CD<sub>3</sub>OD)

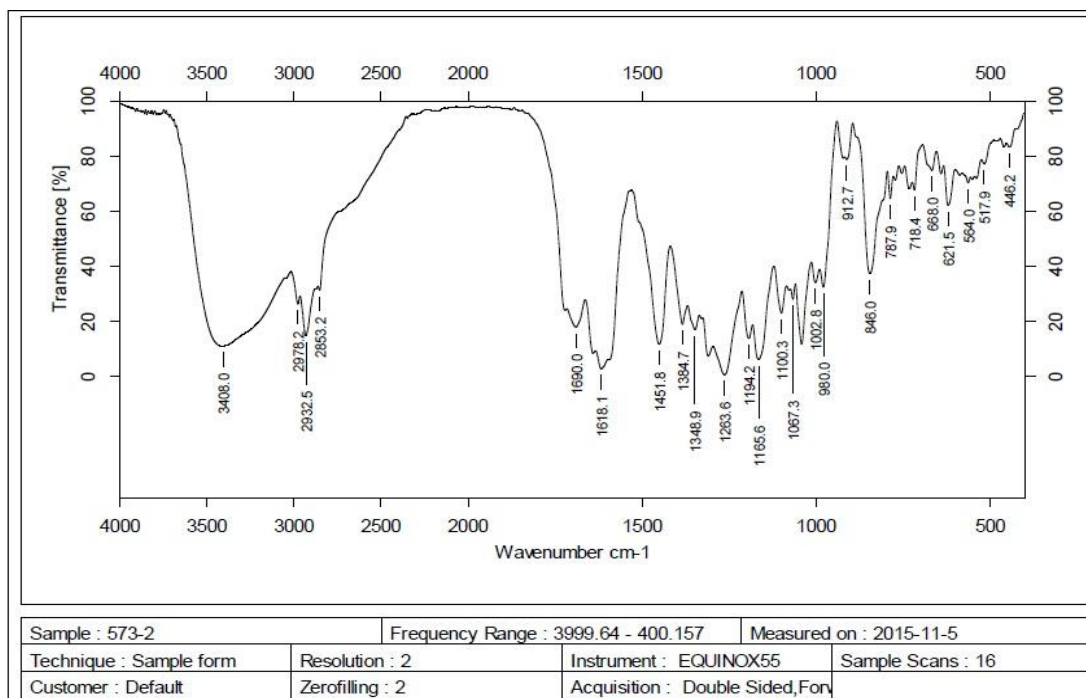

Figure S43 IR (KBr disc) spectrum of penicimenolide E (**5**)

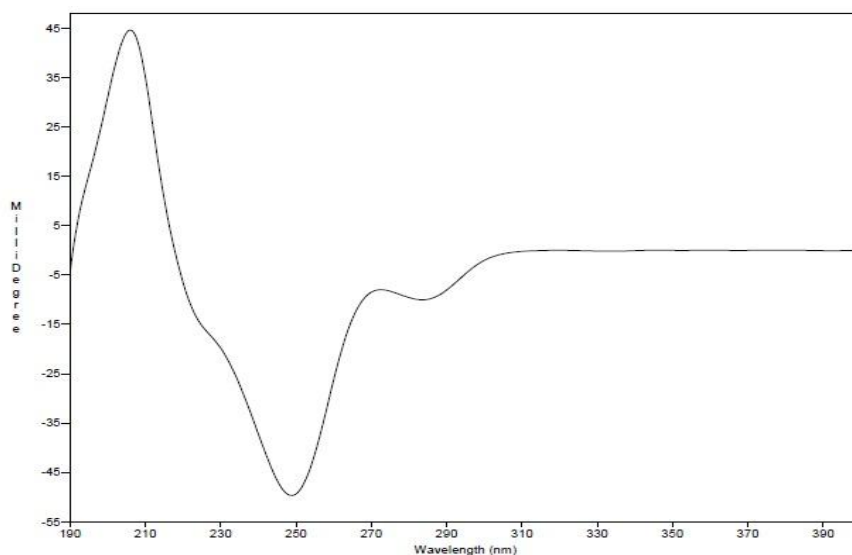

Figure S44 CD spectrum of penicimenolide E (**5**) in MeOH

### Spectrum Peak Pick Report

FIELD FIELD TEXT

Data Set: 没有

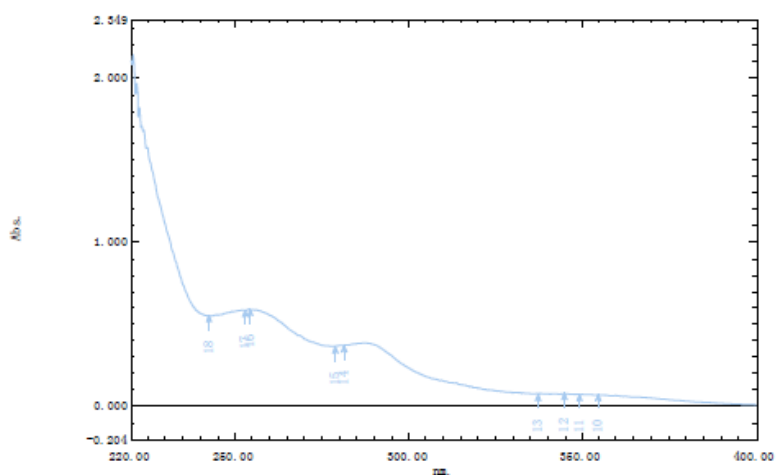

测定属性  
 波长范围 (nm.): 220.00到400.00  
 扫描速度: 高速  
 采样间隔: 0.2  
 自动采样间隔: 启用  
 扫描模式: 单一的

试样准备属性  
 重量: 0.5  
 体积: 10  
 稀释: 407  
 附加信息:

仪器属性  
 仪器类型: UV-1700  
 测定方式: 吸收值  
 狭缝宽: 1.0 nm  
 光源改变波长: 540.0 nm  
 s/n 转换: 标准

| No. | P/V | Wavelength | Abs. | 描述 |
|-----|-----|------------|------|----|
| 1   | ●   | 355.80     | .069 |    |
| 2   | ●   | 350.00     | .073 |    |
| 3   | ●   | 345.60     | .076 |    |
| 4   | ●   | 339.00     | .077 |    |
| 5   | ●   | 287.60     | .386 |    |
| 6   | ●   | 280.40     | .369 |    |
| 7   | ●   | 255.20     | .587 |    |
| 8   | ●   | 253.60     | .588 |    |
| 9   | ●   | 252.00     | .585 |    |
| 10  | ●   | 354.40     | .067 |    |
| 11  | ●   | 349.20     | .072 |    |
| 12  | ●   | 344.80     | .074 |    |
| 13  | ●   | 337.40     | .074 |    |
| 14  | ●   | 281.20     | .368 |    |
| 15  | ●   | 276.80     | .364 |    |
| 16  | ●   | 254.40     | .585 |    |
| 17  | ●   | 252.80     | .582 |    |
| 18  | ●   | 242.40     | .548 |    |

Figure S45 UV spectrum of penicimenolide E (**5**) in MeOH



Single Mass Analysis

Tolerance = 5.0 mDa / DBE: min = -1.5, max = 50.0  
 Element prediction: Off  
 Number of isotope peaks used for i-FIT = 3

Monoisotopic Mass, Even Electron Ions

436 formula(e) evaluated with 6 results within limits (up to 10 best isotopic matches for each mass)

Elements Used:

C: 0-500 H: 0-1000 N: 0-10 O: 0-200

573-2

20150032337 77 (0.632)

1: TOF MS ES+  
9.85e+003

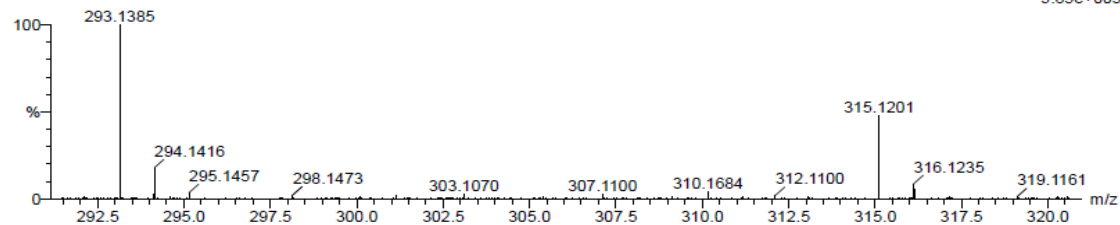

Minimum: -1.5  
 Maximum: 50.0

| Mass     | Calc. Mass | mDa  | PPM   | DBE  | i-FIT | Norm   | Conf (%) | Formula       |
|----------|------------|------|-------|------|-------|--------|----------|---------------|
| 293.1385 | 293.1389   | -0.4 | -1.4  | 6.5  | 187.0 | 0.078  | 92.48    | C16 H21 O5    |
|          | 293.1402   | -1.7 | -5.8  | 11.5 | 189.6 | 2.702  | 6.70     | C17 H17 N4 O  |
|          | 293.1362   | 2.3  | 7.8   | 7.5  | 192.1 | 5.198  | 0.55     | C12 H17 N6 O3 |
|          | 293.1349   | 3.6  | 12.3  | 2.5  | 192.9 | 5.993  | 0.25     | C11 H21 N2 O7 |
|          | 293.1421   | -3.6 | -12.3 | -1.5 | 196.7 | 9.741  | 0.01     | C5 H21 N6 O8  |
|          | 293.1434   | -4.9 | -16.7 | 3.5  | 196.9 | 10.005 | 0.00     | C6 H17 N10 O4 |

Figure S46 HR-ESI-MS spectrum of penicimenolide E (5)

AV-1H-600

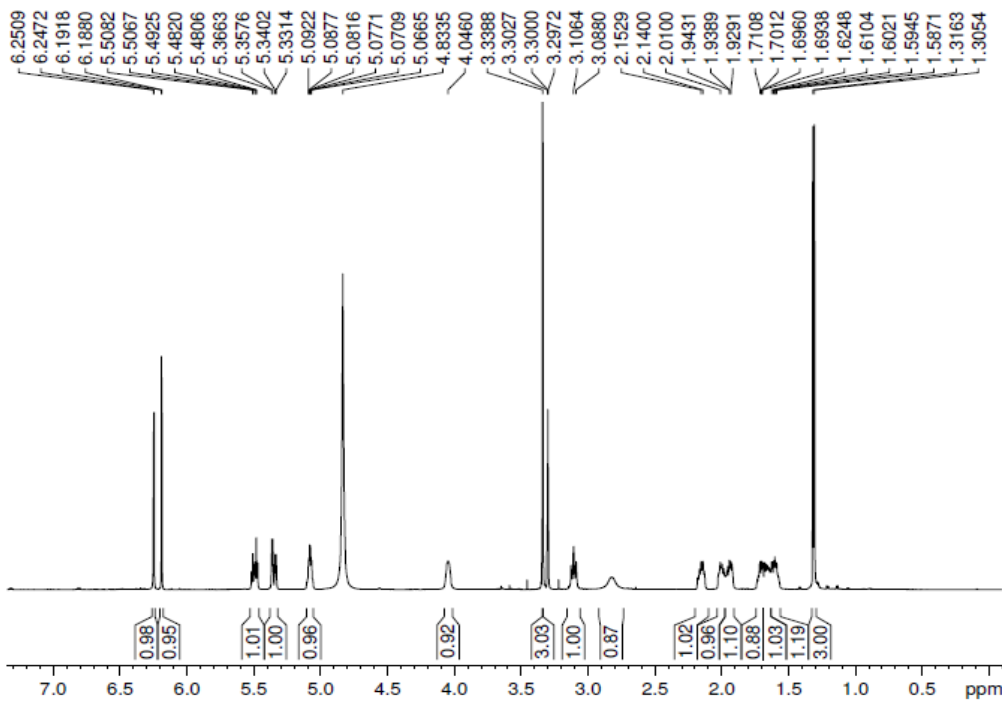

NAME 573-2  
 EXPNO 1  
 PROCNO 1  
 Date\_ 20150204  
 Time 10.24  
 INSTRUM spect  
 PROBHD 5 mm CPTCI 1H-  
 PULPROG zg30  
 TD 65536  
 SOLVENT MeOD  
 NS 8  
 DS 2  
 SWH 9615.385 Hz  
 FIDRES 0.146719 Hz  
 AQ 3.4079220 sec  
 RG 8.84  
 DW 52.000 usec  
 DE 10.00 usec  
 TE 300.4 K  
 D1 1.0000000 sec  
 TDO 1  
 CHANNEL f1  
 SFO1 600.1546812 MHz  
 NUC1 1H  
 P1 7.50 usec  
 SI 65536  
 SF 600.1500173 MHz  
 WDW EM  
 SSB 0  
 LB 0.30 Hz  
 GB 0  
 PC 1.00

Figure S47 <sup>1</sup>H-NMR spectrum of 5 (600MHz, in CD<sub>3</sub>OD)

AV-13C-150

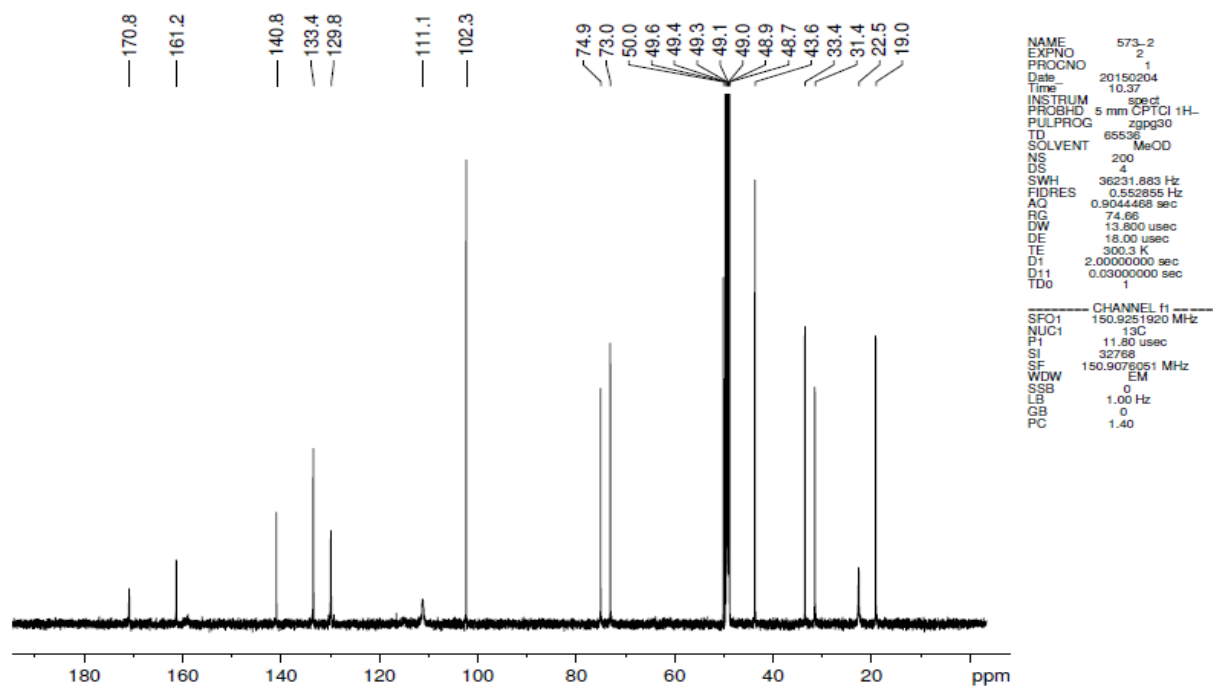

Figure S48 <sup>13</sup>C-NMR spectrum of **5** (150MHz, in CD<sub>3</sub>OD)

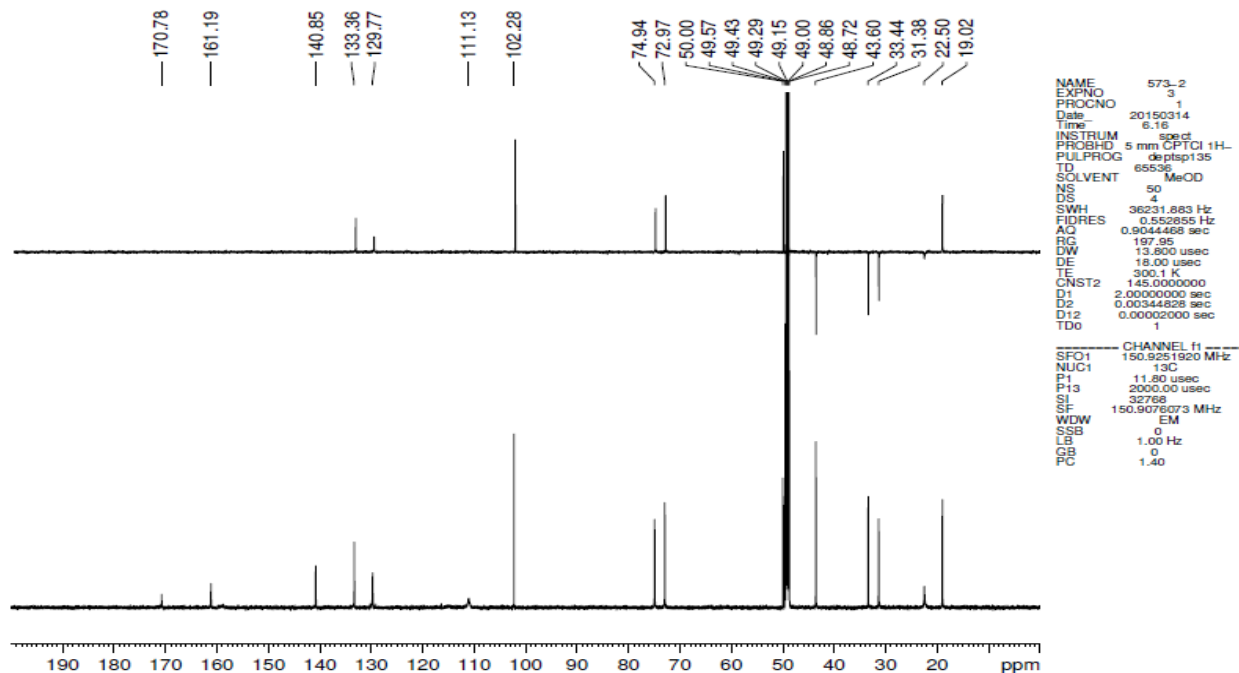

Figure S49 <sup>13</sup>C-NMR and DEPT 135 spectra of **5** (150MHz, in CD<sub>3</sub>OD)

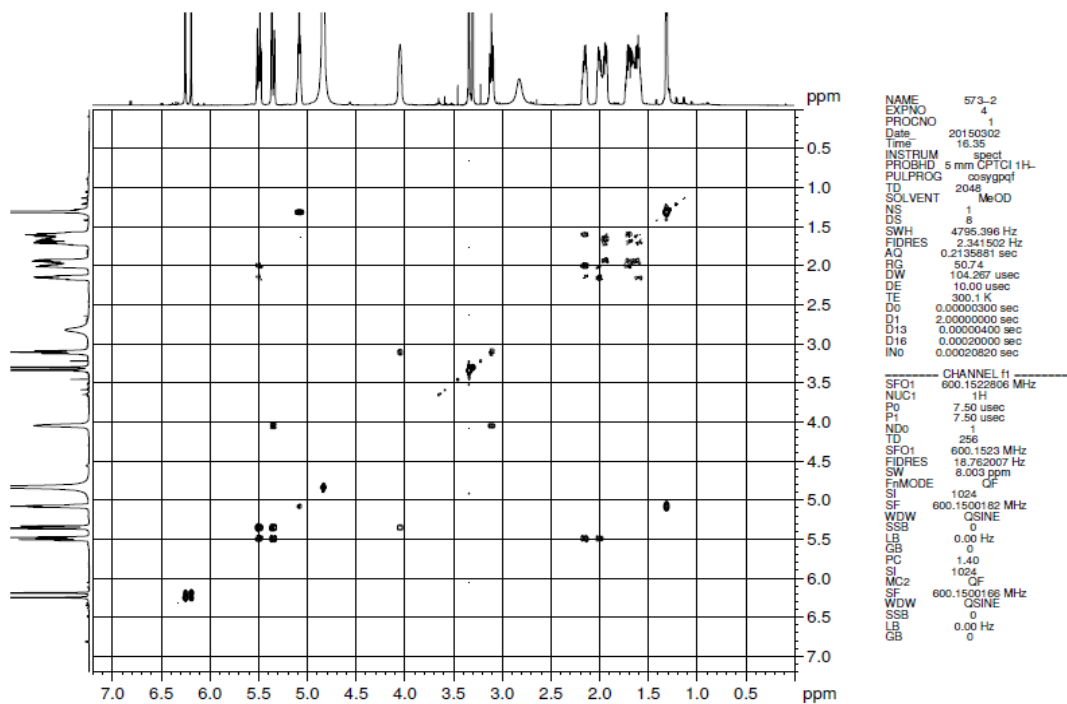

Figure S50  $^1\text{H}$ - $^1\text{H}$  COSY spectrum of **5** (600MHz, in  $\text{CD}_3\text{OD}$ )

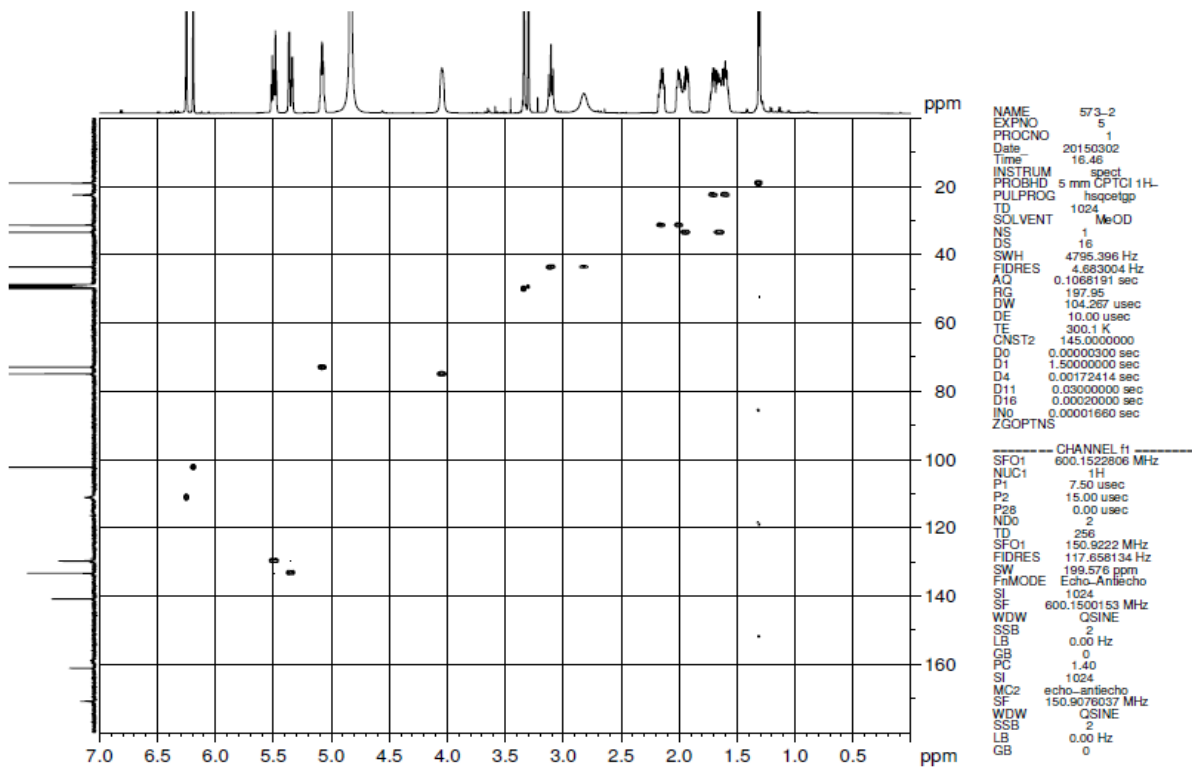

Figure S51 HSQC spectrum of **5** (600MHz, in  $\text{CD}_3\text{OD}$ )

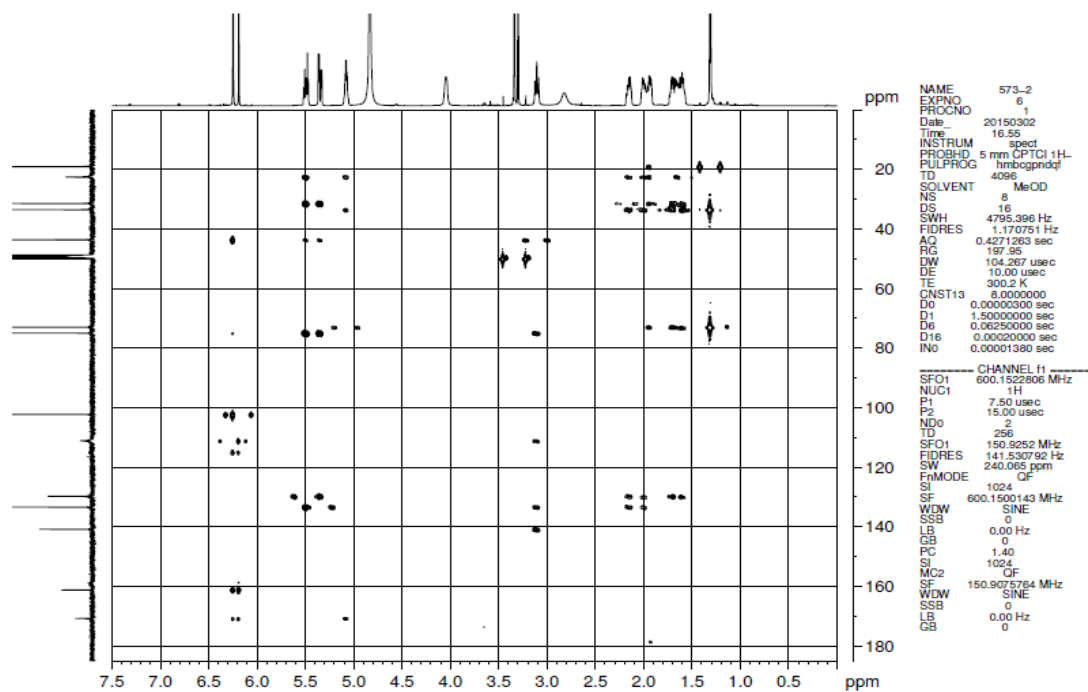

Figure S52 HMBC spectrum of **5** (600MHz, in CD<sub>3</sub>OD)

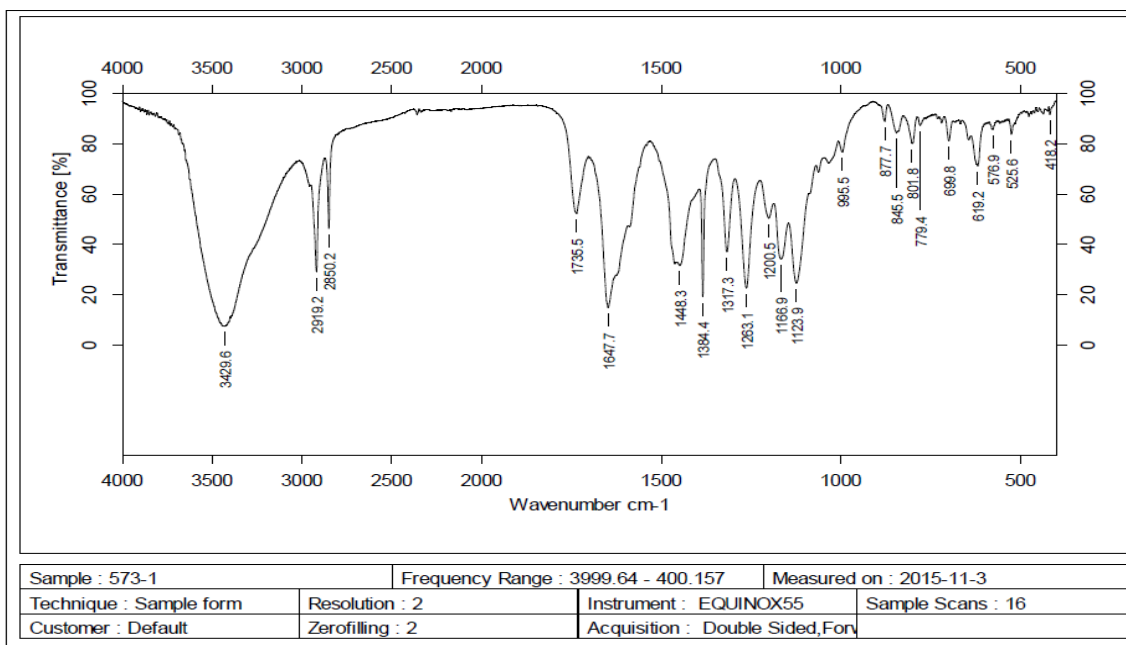

Figure S53 IR (KBr disc) spectrum of penicimenolide F (**6**)

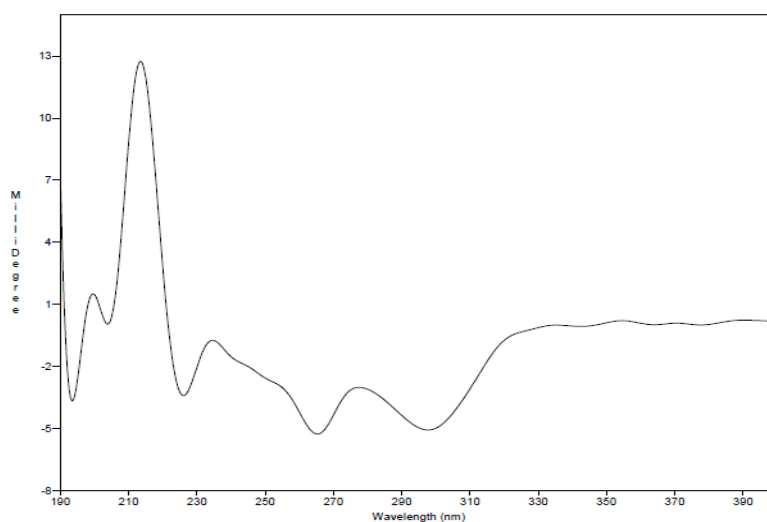

Figure S54 CD spectrum of penicimenolide F (**6**) in MeOH

### Spectrum Peak Pick Report

FIELD FIELD TEXT

Data Set: 没有

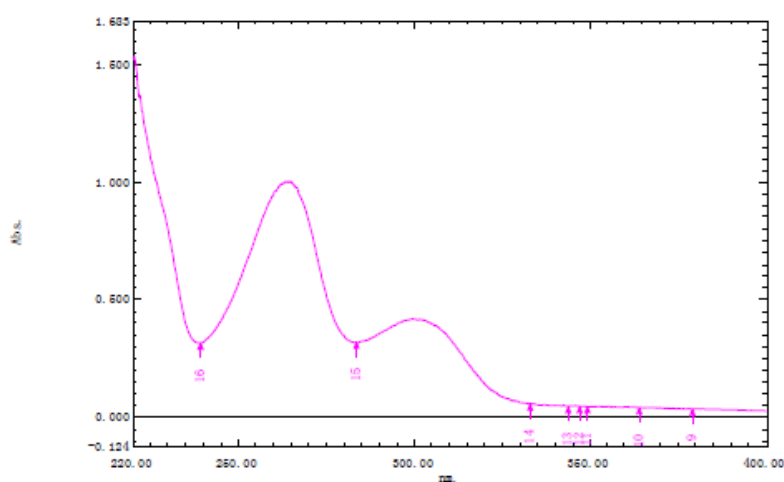

测定属性  
 波长范围 (nm.): 220.00到400.00  
 扫描速度: 高速  
 采样间隔: 0.3  
 自动采样间隔: 启用  
 扫描模式: 单一的

试样准备属性  
 重量: 0.5  
 体积: 10  
 稀释: 10  
 光程长: 407  
 附加信息:

仪器属性  
 仪器类型: UV-1700  
 测定方式: 吸收值  
 狭缝宽: 1.0 nm  
 光源改变波长: 540.8 nm  
 S/N 转换: 标准

| No. | P/V | Wavelength | Abs.  | 描述 |
|-----|-----|------------|-------|----|
| 1   |     | 380.60     | .035  |    |
| 2   |     | 364.60     | .040  |    |
| 3   |     | 355.20     | .044  |    |
| 4   |     | 348.00     | .046  |    |
| 5   |     | 345.60     | .048  |    |
| 6   |     | 333.80     | .057  |    |
| 7   |     | 299.40     | .418  |    |
| 8   |     | 263.80     | 1.003 |    |
| 9   |     | 379.00     | .034  |    |
| 10  |     | 364.00     | .040  |    |
| 11  |     | 349.00     | .041  |    |
| 12  |     | 347.00     | .044  |    |
| 13  |     | 343.80     | .045  |    |
| 14  |     | 333.00     | .052  |    |
| 15  |     | 283.60     | .316  |    |
| 16  |     | 239.20     | .314  |    |

Figure S55 UV spectrum of penicimenolide F (**6**) in MeOH

Single Mass Analysis

Tolerance = 5.0 PPM / DBE: min = -1.5, max = 30.0

Element prediction: Off

Number of isotope peaks used for i-FIT = 3

Monoisotopic Mass, Even Electron Ions

186 formula(e) evaluated with 1 results within limits (up to 20 closest results for each mass)

Elements Used:

C: 0-50 H: 0-100 N: 0-3 O: 0-30

573-1

20150617-05 65 (0.531) Cm (63:65)

1: TOF MS ES+  
6.61e+005

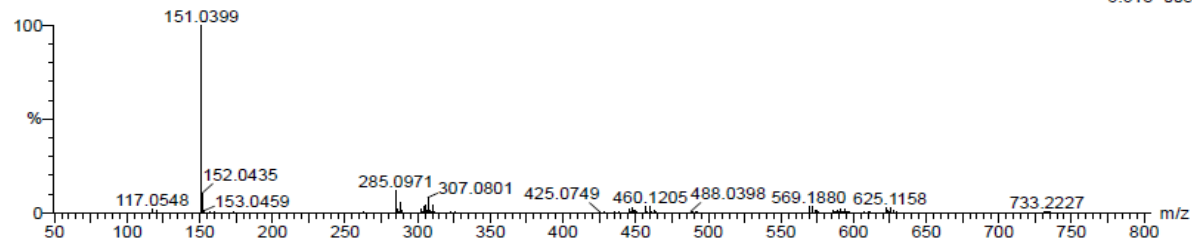

Minimum: -1.5  
Maximum: 5.0 5.0 30.0

| Mass     | Calc. Mass | mDa  | PPM  | DBE | i-FIT | Norm | Conf (%) | Formula    |
|----------|------------|------|------|-----|-------|------|----------|------------|
| 285.0971 | 285.0974   | -0.3 | -1.1 | 5.5 | 288.6 | n/a  | n/a      | C13 H17 O7 |

Figure S56 HR-ESI-MS spectrum of penicimenolide F (6)

AV-1H-600

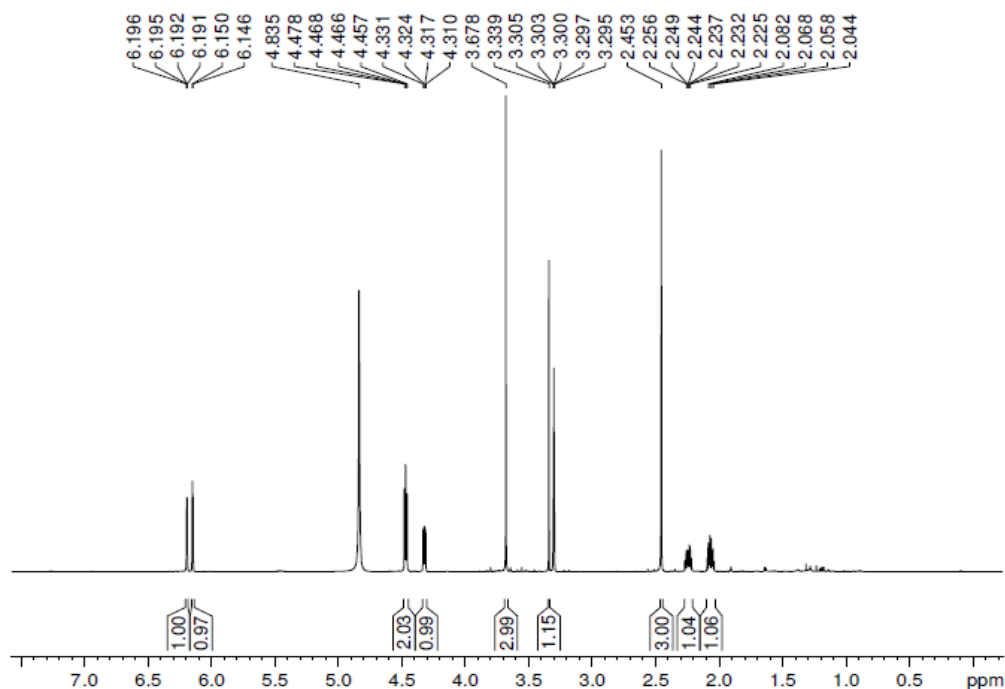

```

NAME      573-1
EXPNO    1
PROCNO   1
Date_    20150204
Time     10.04
INSTRUM  spect
PROBHD   5 mm CPTCl 1H-
PULPROG  zg30
TD        65536
SOLVENT  MeOD
NS        8
DS        2
SWH       9615.385 Hz
FIDRES    0.146719 Hz
AQ        3.4079220 sec
RG        8.84
DW        52.000 usec
DE        10.00 usec
TE        300.4 K
D1        1.00000000 sec
TD0       1
----- CHANNEL f1 -----
SFO1     600.1546812 MHz
NUC1     1H
P1       7.50 usec
SI       65536
SF       600.1500173 MHz
WDW      EM
SSB      0
LB       0.30 Hz
GB       0
PC       1.00
    
```

Figure S57 <sup>1</sup>H-NMR spectrum of 6 (600 MHz, in CD<sub>3</sub>OD)

AV-13C-150

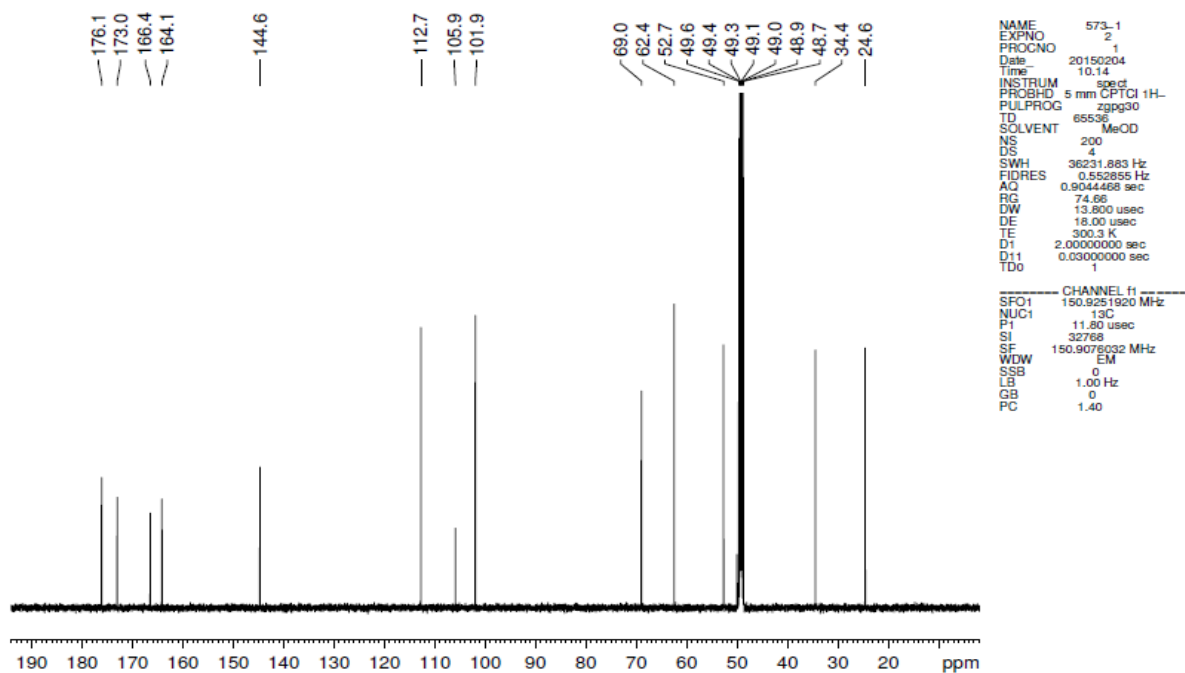

Figure S58 <sup>13</sup>C-NMR spectrum of **6** (150MHz, in CD<sub>3</sub>OD)

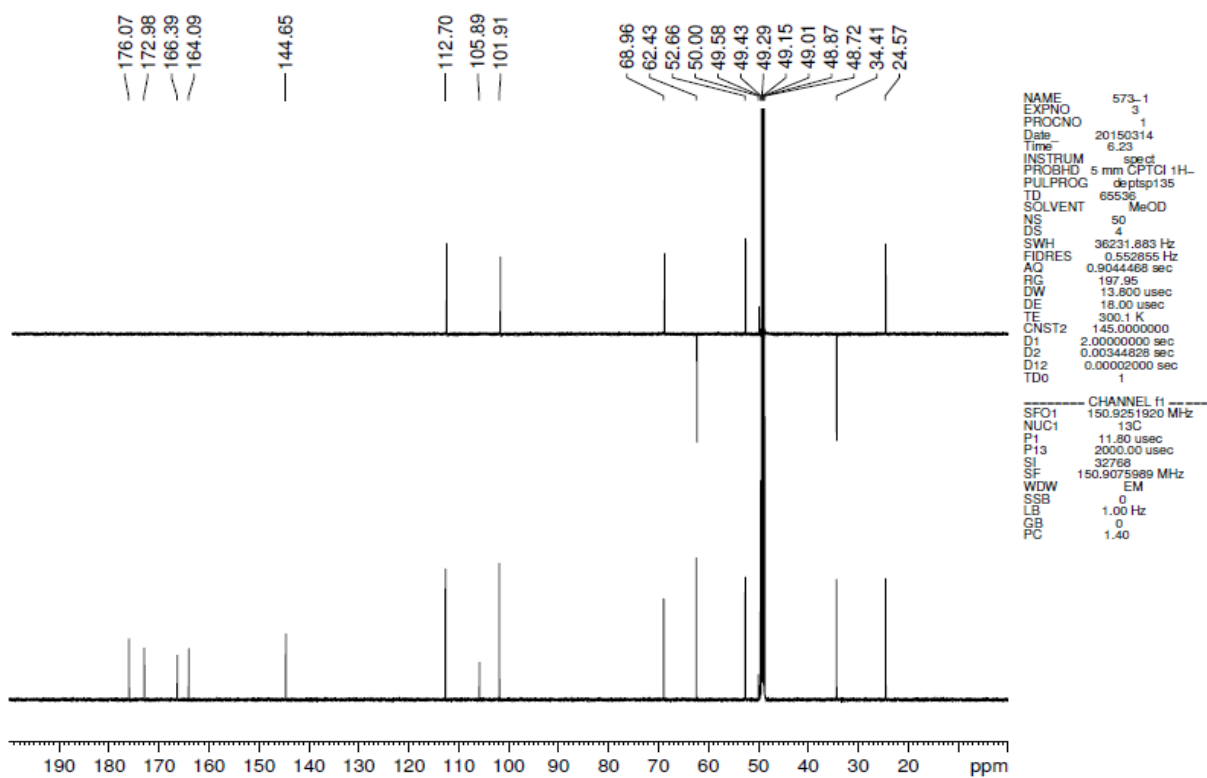

Figure S59 <sup>13</sup>C-NMR and DEPT 135 spectra of **6** (150MHz, in CD<sub>3</sub>OD)

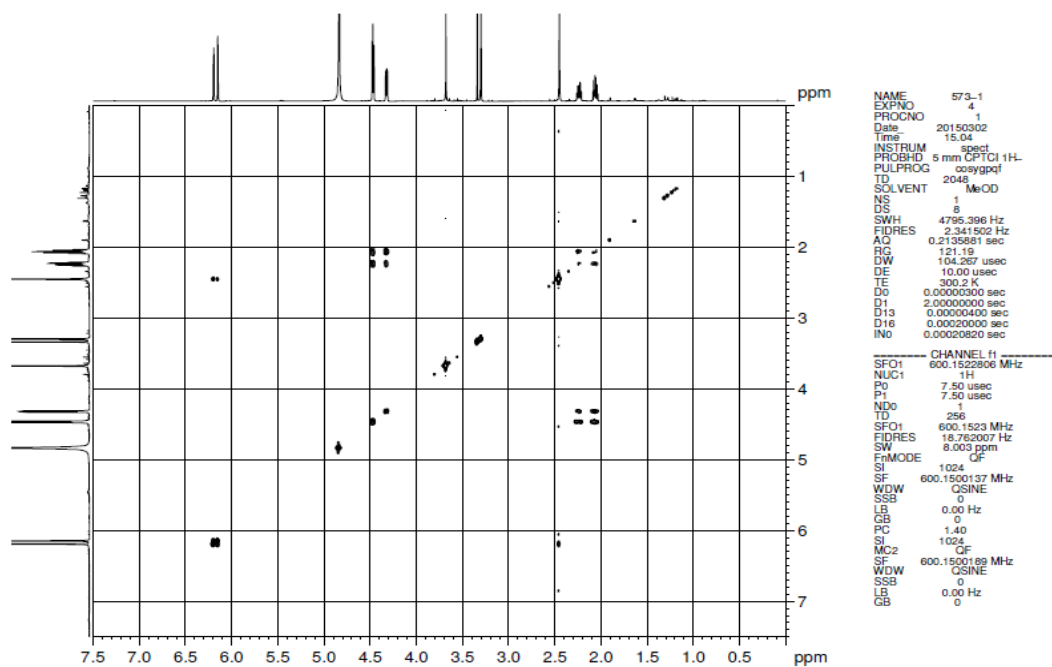

Figure S60  $^1\text{H}$ - $^1\text{H}$  COSY spectrum of **6** (600MHz, in  $\text{CD}_3\text{OD}$ )

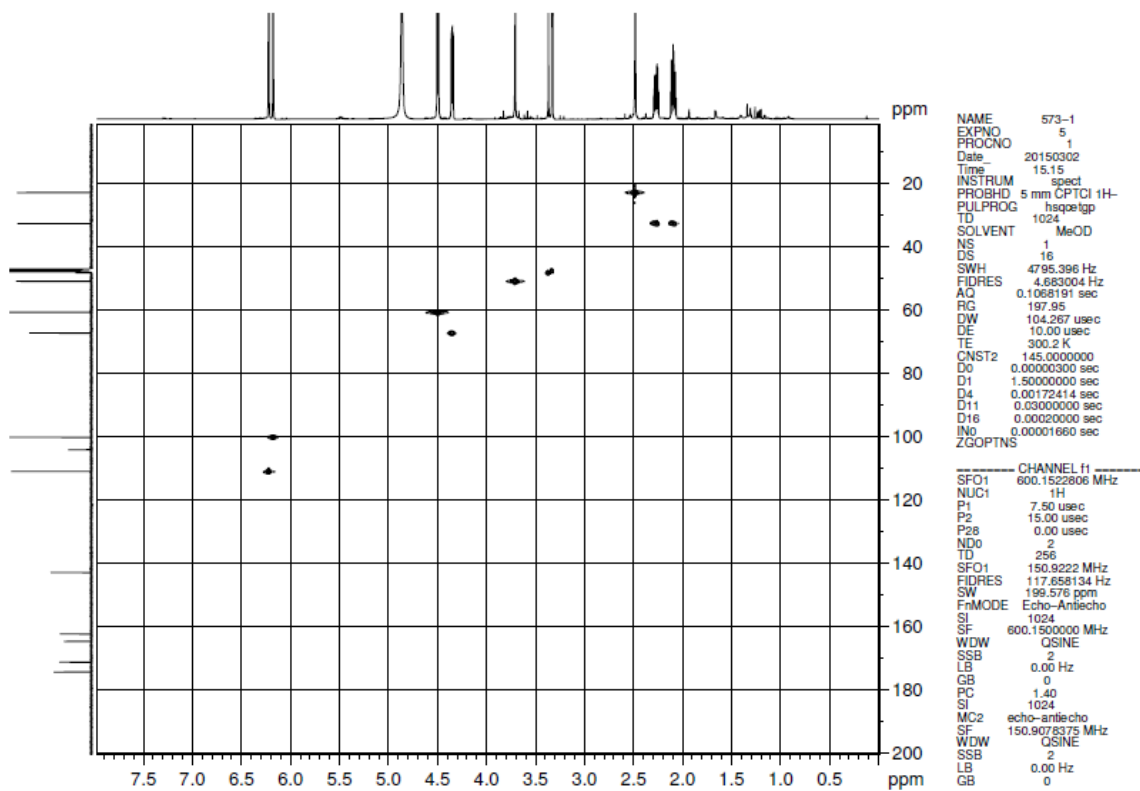

Figure S61 HSQC spectrum of **6** (600MHz, in  $\text{CD}_3\text{OD}$ )



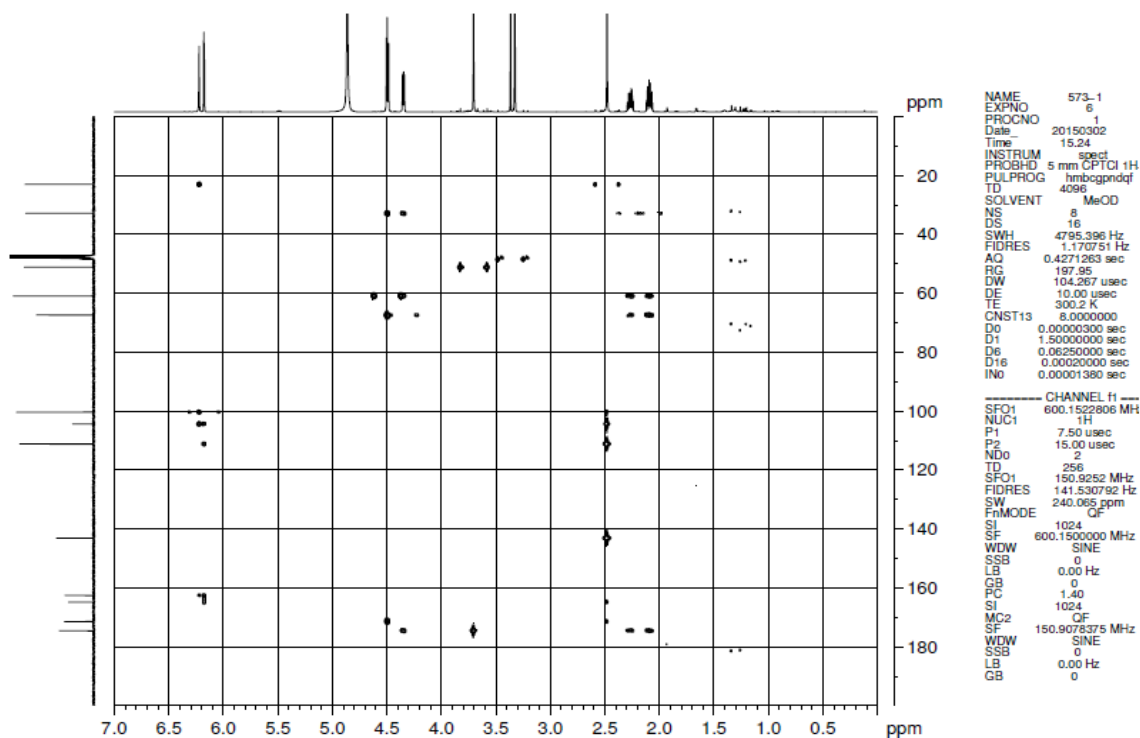

Figure S62 HMBC spectrum of **6** (600MHz, in CD<sub>3</sub>OD)

#### 4. NMR data of compound **8**

Table S1 NMR data of compound **8** in CD<sub>3</sub>OD

| position | $\delta_C$ | $\delta_H$ (J in Hz)             |
|----------|------------|----------------------------------|
| 1        | 172.6      |                                  |
| 3        | 74.7       | 5.10, m                          |
| 4        | 32.9       | 1.62, m<br>1.64, m               |
| 5        | 22.3       | 1.46, m<br>1.47, m               |
| 6        | 28.3       | 1.47, m<br>1.49, m               |
| 7        | 22.3       | 2.00, m<br>1.79, m               |
| 8        | 42.7       | 2.67, m<br>2.33, m               |
| 9        | 211.8      |                                  |
| 10       | 51.8       | 4.68, d (18.7)<br>3.78, d (18.5) |
| 11       | 140.4      |                                  |
| 12       | 113.9      | 6.09, d (2.3)                    |
| 13       | 163.9      |                                  |
| 14       | 103.0      | 6.24, d (2.3)                    |
| 15       | 166.7      |                                  |
| 16       | 106.8      |                                  |
| 17       | 19.6       | 1.28, d (6.2)                    |

## 5. <sup>1</sup>H-NMR chemical shift differences for the MTPA esters of **3**, **5** and **6**

Table S2 <sup>1</sup>H-NMR chemical shift differences between MTPA esters of **3a** and **3b** (Pyridine-d<sub>5</sub>)

| position | <b>3</b>            | <b>3a</b>           | <b>3b</b>           | $\Delta\delta$ |
|----------|---------------------|---------------------|---------------------|----------------|
|          | $\delta_{\text{H}}$ | $\delta_{\text{H}}$ | $\delta_{\text{H}}$ |                |
| 7        | 5.928               | 5.761               | 5.778               | -0.017         |
| 3'       | 1.627               | 1.581               | 1.511               | 0.069          |

Table S3 <sup>1</sup>H-NMR chemical shift differences between MTPA esters of **5a** and **5b** (Pyridine-d<sub>5</sub>)

| position | <b>5</b>            | <b>5a</b>           | <b>5b</b>           | $\Delta\delta$ |
|----------|---------------------|---------------------|---------------------|----------------|
|          | $\delta_{\text{H}}$ | $\delta_{\text{H}}$ | $\delta_{\text{H}}$ |                |
| 4        | 2.052               | 1.705               | 1.629               | 0.076          |
|          | -                   | -                   | -                   | -              |
| 5        | 1.768               | 1.507               | 1.466               | 0.041          |
|          | -                   | -                   | -                   | -              |
| 6        | 2.247               | 2.025               | 1.937               | 0.05           |
|          | 2.120               | 1.860               | 1.747               | 0.05           |
| 7        | 4.754               | -                   | -                   | -              |
| 8        | 5.598               | 5.537               | 5.406               | 0.131          |
| 9        | 3.876               | -                   | -                   | -              |
| 10       | 3.461               | 3.364               | 3.409               | -0.306         |
| 17       | 1.408               | 1.225               | 1.073               | 0.152          |

Table S4 <sup>1</sup>H-NMR chemical shift differences between MTPA esters of **6a** and **6b** (Pyridine-d<sub>5</sub>)

| position | <b>6</b>            | <b>6a</b>           | <b>6b</b>           | $\Delta\delta$ |
|----------|---------------------|---------------------|---------------------|----------------|
|          | $\delta_{\text{H}}$ | $\delta_{\text{H}}$ | $\delta_{\text{H}}$ |                |
| 1'       | 4.792               | 4.555               | 4.440               | 0.115          |
|          | 4.756               | 4.518               | 4.394               | 0.120          |
| 2'       | 2.496               | 2.538               | 2.476               | 0.06           |
|          | 2.358               | 2.456               | 2.423               | 0.03           |
| 5'       | 3.69                | 3.709               | 3.775               | -0.07          |

## 6. Single crystal X-ray diffraction analysis of compound 10

data\_574-4-4

\_audit\_creation\_date 2015-10-17

\_audit\_creation\_method

;

Olex2 1.2

(compiled 2015.09.30 svn.r3233 for OlexSys, GUI svn.r5103)

;

\_publ\_contact\_author\_address ?

\_publ\_contact\_author\_email ?

\_publ\_contact\_author\_name "

\_publ\_contact\_author\_phone ?

\_publ\_section\_references

;

Dolomanov, O.V., Bourhis, L.J., Gildea, R.J, Howard, J.A.K. & Puschmann, H.

(2009), *J. Appl. Cryst.* 42, 339-341.

Sheldrick, G.M. (2008). *Acta Cryst.* A64, 112-122.

Sheldrick, G.M. (2015). *Acta Cryst.* C71, 3-8.

;

\_chemical\_name\_common ?

\_chemical\_name\_systematic

;

?

;

\_chemical\_formula\_moiety 'C17 H22 O6'

\_chemical\_formula\_sum 'C17 H22 O6'

\_chemical\_formula\_weight 322.35

\_chemical\_absolute\_configuration ad

\_chemical\_melting\_point ?

\_chemical\_oxdiff\_formula 'C H O'

loop\_

\_atom\_type\_symbol

\_atom\_type\_description

\_atom\_type\_scatter\_dispersion\_real

\_atom\_type\_scatter\_dispersion\_imag

\_atom\_type\_scatter\_source

'C' 'C' 0.0181 0.0091 'International Tables Vol C Tables 4.2.6.8 and 6.1.1.4'

'H' 'H' 0.0000 0.0000 'International Tables Vol C Tables 4.2.6.8 and 6.1.1.4'

'O' 'O' 0.0492 0.0322 'International Tables Vol C Tables 4.2.6.8 and 6.1.1.4'

\_space\_group\_crystal\_system 'monoclinic'

\_space\_group\_IT\_number 4

\_space\_group\_name\_H-M\_alt 'P 1 21 1'

\_space\_group\_name\_Hall 'P 2yb'

loop\_

\_space\_group\_symop\_id

\_space\_group\_symop\_operation\_xyz

1 'x, y, z'

2 '-x, y+1/2, -z'

\_cell\_length\_a 5.05804(7)

\_cell\_length\_b 11.74745(14)

\_cell\_length\_c 13.77837(18)

\_cell\_angle\_alpha 90.00

\_cell\_angle\_beta 100.1922(13)

\_cell\_angle\_gamma 90.00

\_cell\_volume 805.778(18)

\_cell\_formula\_units\_Z 2

\_cell\_measurement\_reflns\_used 4162

\_cell\_measurement\_temperature 150

\_cell\_measurement\_theta\_max 75.1230

\_cell\_measurement\_theta\_min 3.2430

```

_exptl_absorpt_coefficient_mu  0.836
_exptl_absorpt_correction_T_max  1.00000
_exptl_absorpt_correction_T_min  0.54692
_exptl_absorpt_correction_type  multi-scan
_exptl_absorpt_process_details
;
CrysAlisPro, Agilent Technologies,
Version 1.171.36.32 (release 02-08-2013 CrysAlis171 .NET)
(compiled Aug  2 2013,16:46:58)
Empirical absorption correction using spherical harmonics,
implemented in SCALE3 ABSPACK scaling algorithm.
;
_exptl_crystal_colour          "
_exptl_crystal_density_diffn   1.329
_exptl_crystal_density_meas    ?
_exptl_crystal_density_method  'not measured'
_exptl_crystal_description     "
_exptl_crystal_F_000           344
_exptl_crystal_size_max        ?
_exptl_crystal_size_mid        ?
_exptl_crystal_size_min        ?
_exptl_special_details
;
?
;
_diffn_reflns_av_R_equivalents 0.0167
_diffn_reflns_av_unetI/netI     0.0140
_diffn_reflns_limit_h_max       6
_diffn_reflns_limit_h_min       -5
_diffn_reflns_limit_k_max       14

```

```

_diffrn_reflns_limit_k_min    -14
_diffrn_reflns_limit_l_max    16
_diffrn_reflns_limit_l_min    -17
_diffrn_reflns_number         5093
_diffrn_reflns_theta_full     75.46
_diffrn_reflns_theta_max      75.46
_diffrn_reflns_theta_min      3.26
_diffrn_ambient_temperature   150
_diffrn_detector_area_resol_mean 10.6525
_diffrn_measured_fraction_theta_full 0.971
_diffrn_measured_fraction_theta_max 0.971
_diffrn_measurement_details
;
#__ type_ start_ end___ width___ exp.time_
  1 omega -90.00 -10.00 1.0000 1.0000
omega___ theta___ kappa___ phi_____ frames
  -   -39.3998 -57.0000 30.0000 80
#__ type_ start_ end___ width___ exp.time_
  2 omega -50.00 34.00 1.0000 1.0000
omega___ theta___ kappa___ phi_____ frames
  -   -39.3998 38.0000 60.0000 84
#__ type_ start_ end___ width___ exp.time_
  3 omega -96.00 -32.00 1.0000 1.0000
omega___ theta___ kappa___ phi_____ frames
  -   -39.3998 -38.0000 -120.0000 64
#__ type_ start_ end___ width___ exp.time_
  4 omega 42.00 79.00 1.0000 1.0000
omega___ theta___ kappa___ phi_____ frames
  -   39.3998 -99.0000 -90.0000 37

```

```

#__ type_ start_ end___ width___ exp.time_
  5 omega  17.00  43.00  1.0000  1.0000
omega___ theta___ kappa___ phi_____ frames
  -    39.3998  57.0000 -90.0000 26
#__ type_ start_ end___ width___ exp.time_
  6 omega -27.00  56.00  1.0000  1.0000
omega___ theta___ kappa___ phi_____ frames
  -    39.3998 -38.0000 -180.0000 83
#__ type_ start_ end___ width___ exp.time_
  7 omega  81.00 178.00  1.0000  1.0000
omega___ theta___ kappa___ phi_____ frames
  -   111.3657  30.0000  60.0000 97
#__ type_ start_ end___ width___ exp.time_
  8 omega 120.00 151.00  1.0000  1.0000
omega___ theta___ kappa___ phi_____ frames
  -   111.3657  45.0000 120.0000 31
#__ type_ start_ end___ width___ exp.time_
  9 omega  82.00 177.00  1.0000  1.0000
omega___ theta___ kappa___ phi_____ frames
  -   111.3657  30.0000 -30.0000 95
#__ type_ start_ end___ width___ exp.time_
 10 omega  83.00 108.00  1.0000  1.0000
omega___ theta___ kappa___ phi_____ frames
  -   111.3657 -94.0000 -90.0000 25
#__ type_ start_ end___ width___ exp.time_
 11 omega  30.00 102.00  1.0000  1.0000
omega___ theta___ kappa___ phi_____ frames
  -   111.3657 -94.0000 120.0000 72
#__ type_ start_ end___ width___ exp.time_
 12 omega  53.00  95.00  1.0000  1.0000

```

```

omega___ theta___ kappa___ phi_____ frames
- 111.3657 -94.0000 0.0000 42
#__ type_ start_ end___ width___ exp.time_
13 omega 35.00 62.00 1.0000 1.0000
omega___ theta___ kappa___ phi_____ frames
- 111.3657 -94.0000 -90.0000 27
#__ type_ start_ end___ width___ exp.time_
14 omega 30.00 111.00 1.0000 1.0000
omega___ theta___ kappa___ phi_____ frames
- 111.3657 -98.0000 -142.0000 81
#__ type_ start_ end___ width___ exp.time_
15 omega 81.00 175.00 1.0000 1.0000
omega___ theta___ kappa___ phi_____ frames
- 111.3657 61.0000 -150.0000 94
#__ type_ start_ end___ width___ exp.time_
16 omega 33.00 89.00 1.0000 1.0000
omega___ theta___ kappa___ phi_____ frames
- 111.3657 -30.0000 150.0000 56
#__ type_ start_ end___ width___ exp.time_
17 omega 34.00 81.00 1.0000 1.0000
omega___ theta___ kappa___ phi_____ frames
- 111.3657 -30.0000 -90.0000 47
#__ type_ start_ end___ width___ exp.time_
18 omega 88.00 132.00 1.0000 1.0000
omega___ theta___ kappa___ phi_____ frames
- 111.3657 45.0000 90.0000 44
#__ type_ start_ end___ width___ exp.time_
19 omega 78.00 109.00 1.0000 1.0000
omega___ theta___ kappa___ phi_____ frames
- 111.3657 -94.0000 30.0000 31

```



```

#__ type_ start__ end___ width___ exp.time_
20 omega 104.00 167.00 1.0000 1.0000
omega___ theta___ kappa___ phi_____ frames
- 111.3657 111.0000 60.0000 63
;
_diffrn_measurement_device_type 'SuperNova, Dual, Cu at zero, Atlas'
_diffrn_measurement_method '\w scans'
_diffrn_orient_matrix_UB_11 0.2563312000
_diffrn_orient_matrix_UB_12 0.0018305000
_diffrn_orient_matrix_UB_13 0.0792356000
_diffrn_orient_matrix_UB_21 -0.0541486000
_diffrn_orient_matrix_UB_22 -0.1237051000
_diffrn_orient_matrix_UB_23 0.0279951000
_diffrn_orient_matrix_UB_31 0.1646206000
_diffrn_orient_matrix_UB_32 -0.0434483000
_diffrn_orient_matrix_UB_33 -0.0764728000
_diffrn_radiation_monochromator mirror
_diffrn_radiation_type CuK\alpha
_diffrn_radiation_wavelength 1.54184
_diffrn_source 'SuperNova (Cu) X-ray Source'
_diffrn_standards_decay_% ?
_diffrn_standards_interval_count ?
_diffrn_standards_interval_time ?
_diffrn_standards_number ?
_reflns_number_gt 3123
_reflns_number_total 3141
_reflns_odcompleteness_completeness 98.58
_reflns_odcompleteness_iscentric 1
_reflns_odcompleteness_theta 68.13
_reflns_threshold_expression >2sigma(I)

```

```

_computing_cell_refinement
;
CrysAlisPro, Agilent Technologies,
Version 1.171.36.32 (release 02-08-2013 CrysAlis171 .NET)
(compiled Aug 2 2013,16:46:58)
;
_computing_data_collection
;
CrysAlisPro, Agilent Technologies,
Version 1.171.36.32 (release 02-08-2013 CrysAlis171 .NET)
(compiled Aug 2 2013,16:46:58)
;
_computing_data_reduction
;
CrysAlisPro, Agilent Technologies,
Version 1.171.36.32 (release 02-08-2013 CrysAlis171 .NET)
(compiled Aug 2 2013,16:46:58)
;
_computing_molecular_graphics 'Olex2 (Dolomanov et al., 2009)'
_computing_publication_material 'Olex2 (Dolomanov et al., 2009)'
_computing_structure_refinement 'ShelXL (Sheldrick, 2015)'
_computing_structure_solution 'XS (Sheldrick, 2008)'
_refine_diff_density_max 0.202
_refine_diff_density_min -0.199
_refine_diff_density_rms 0.038
_refine_ls_abs_structure_details 'Flack H D (1983), Acta Cryst. A39, 876-881'
_refine_ls_abs_structure_Flack 0.08(10)
_refine_ls_extinction_coef ?
_refine_ls_extinction_method none
_refine_ls_goodness_of_fit_ref 0.971

```

```

_refine_ls_hydrogen_treatment  constr
_refine_ls_matrix_type        full
_refine_ls_number_parameters   212
_refine_ls_number_reflns      3141
_refine_ls_number_restraints   1
_refine_ls_R_factor_all       0.0336
_refine_ls_R_factor_gt        0.0333
_refine_ls_restrained_S_all    0.971
_refine_ls_shift/su_max        0.000
_refine_ls_shift/su_mean       0.000
_refine_ls_structure_factor_coef  Fsqd
_refine_ls_weighting_details
'calc w=1/[\s^2^(Fo^2^)+(0.1000P)^2^+0.0000P] where P=(Fo^2^+2Fc^2^)/3'
_refine_ls_weighting_scheme    calc
_refine_ls_wR_factor_gt        0.1000
_refine_ls_wR_factor_ref       0.1007
_refine_special_details
;

```

Refinement of  $F^2$  against ALL reflections. The weighted R-factor wR and goodness of fit S are based on  $F^2$ , conventional R-factors R are based on F, with F set to zero for negative  $F^2$ . The threshold expression of  $F^2 > 2\sigma(F^2)$  is used only for calculating R-factors(gt) etc. and is not relevant to the choice of reflections for refinement. R-factors based on  $F^2$  are statistically about twice as large as those based on F, and R-factors based on ALL data will be even larger.

```

;
_olex2_refinement_description
;

```

#### 1. Fixed Uiso

At 1.2 times of:

All C(H) groups, All C(H,H) groups

At 1.5 times of:

All C(H,H,H) groups, All O(H) groups

2.a Ternary CH refined with riding coordinates:

C7(H7), C3(H3)

2.b Secondary CH2 refined with riding coordinates:

C8(H8A,H8B), C10(H10A,H10B), C5(H5A,H5B), C4(H4A,H4B), C6(H6A,H6B)

2.c Aromatic/amide H refined with riding coordinates:

C14(H14), C12(H12)

2.d Idealised Me refined as rotating group:

C18(H18A,H18B,H18C), C17(H17A,H17B,H17C)

2.e Idealised tetrahedral OH refined as rotating group:

O1(H1), O6(H6)

;

\_atom\_sites\_solution\_hydrogens geom

\_atom\_sites\_solution\_primary direct

\_atom\_sites\_solution\_secondary difmap

loop\_

\_atom\_site\_label

\_atom\_site\_type\_symbol

\_atom\_site\_fract\_x

\_atom\_site\_fract\_y

\_atom\_site\_fract\_z

\_atom\_site\_U\_iso\_or\_equiv

\_atom\_site\_adp\_type

\_atom\_site\_occupancy

\_atom\_site\_calc\_flag

\_atom\_site\_disorder\_assembly

\_atom\_site\_disorder\_group

\_atom\_site\_refinement\_flags\_posn

O5 O 0.09976(16) 0.24159(8) 0.14651(7) 0.0257(2) Uani 1 d . . .  
 O1 O -0.03984(19) 0.60821(9) 0.33759(8) 0.0343(2) Uani 1 d . . .  
 H1 H -0.0778 0.5522 0.3704 0.051 Uiso 1 calc . . GR  
 O6 O 0.4603(2) 0.70790(8) 0.09151(7) 0.0342(2) Uani 1 d . . .  
 H6 H 0.4091 0.7733 0.1045 0.051 Uiso 1 calc . . GR  
 O3 O 0.29093(18) 0.28453(8) 0.36167(6) 0.0267(2) Uani 1 d . . .  
 O4 O 0.27681(18) -0.07692(7) 0.10716(6) 0.0260(2) Uani 1 d . . .  
 O2 O 0.0163(2) 0.41098(10) 0.41253(8) 0.0377(3) Uani 1 d . . .  
 C11 C 0.4129(2) 0.43710(10) 0.21309(8) 0.0200(2) Uani 1 d . . .  
 C16 C 0.2390(2) 0.46321(10) 0.28110(8) 0.0209(2) Uani 1 d . . .  
 C1 C 0.1699(2) 0.38533(11) 0.35630(9) 0.0239(2) Uani 1 d . . .  
 C9 C 0.3413(2) 0.22805(10) 0.16438(7) 0.0178(2) Uani 1 d . . .  
 C14 C 0.1935(3) 0.65669(10) 0.21330(10) 0.0277(3) Uani 1 d . . .  
 H14 H 0.1136 0.7300 0.2111 0.033 Uiso 1 calc . . R  
 C8 C 0.4613(2) 0.11390(9) 0.14335(8) 0.0210(2) Uani 1 d . . .  
 H8A H 0.6518 0.1115 0.1762 0.025 Uiso 1 calc . . R  
 H8B H 0.4562 0.1066 0.0715 0.025 Uiso 1 calc . . R  
 C12 C 0.4767(2) 0.52030(10) 0.15095(9) 0.0221(2) Uani 1 d . . .  
 H12 H 0.5927 0.5022 0.1060 0.026 Uiso 1 calc . . R  
 C7 C 0.3119(2) 0.01291(9) 0.17901(8) 0.0205(2) Uani 1 d . . .  
 H7 H 0.1303 0.0396 0.1883 0.025 Uiso 1 calc . . R  
 C10 C 0.5363(2) 0.32141(9) 0.20361(8) 0.0198(2) Uani 1 d . . .  
 H10A H 0.6701 0.3285 0.1595 0.024 Uiso 1 calc . . R  
 H10B H 0.6338 0.2982 0.2693 0.024 Uiso 1 calc . . R  
 C3 C 0.2421(2) 0.20521(12) 0.43870(8) 0.0266(3) Uani 1 d . . .  
 H3 H 0.0633 0.2220 0.4569 0.032 Uiso 1 calc . . R  
 C5 C 0.4987(2) 0.05022(11) 0.36038(8) 0.0250(2) Uani 1 d . . .  
 H5A H 0.5892 0.1182 0.3392 0.030 Uiso 1 calc . . R  
 H5B H 0.6190 0.0168 0.4178 0.030 Uiso 1 calc . . R  
 C18 C 0.0440(3) -0.05978(12) 0.03270(9) 0.0316(3) Uani 1 d . . .

H18A H 0.0435 -0.1154 -0.0203 0.047 Uiso 1 calc . . GR  
 H18B H 0.0474 0.0173 0.0058 0.047 Uiso 1 calc . . GR  
 H18C H -0.1182 -0.0695 0.0616 0.047 Uiso 1 calc . . GR  
 C4 C 0.2360(2) 0.08723(12) 0.39228(8) 0.0268(3) Uani 1 d . . .  
 H4A H 0.0906 0.0854 0.3338 0.032 Uiso 1 calc . . R  
 H4B H 0.1905 0.0309 0.4402 0.032 Uiso 1 calc . . R  
 C15 C 0.1290(2) 0.57493(10) 0.27746(9) 0.0247(3) Uani 1 d . . .  
 C6 C 0.4560(2) -0.03674(11) 0.27614(9) 0.0265(3) Uani 1 d . . .  
 H6A H 0.6328 -0.0666 0.2668 0.032 Uiso 1 calc . . R  
 H6B H 0.3499 -0.1014 0.2948 0.032 Uiso 1 calc . . R  
 C17 C 0.4610(3) 0.22269(14) 0.52803(9) 0.0348(3) Uani 1 d . . .  
 H17A H 0.6370 0.2104 0.5093 0.052 Uiso 1 calc . . GR  
 H17B H 0.4364 0.1685 0.5797 0.052 Uiso 1 calc . . GR  
 H17C H 0.4512 0.3005 0.5527 0.052 Uiso 1 calc . . GR  
 C13 C 0.3749(3) 0.63107(10) 0.15233(9) 0.0254(3) Uani 1 d . . .  
 loop\_  
 \_atom\_site\_aniso\_label  
 \_atom\_site\_aniso\_U\_11  
 \_atom\_site\_aniso\_U\_22  
 \_atom\_site\_aniso\_U\_33  
 \_atom\_site\_aniso\_U\_23  
 \_atom\_site\_aniso\_U\_13  
 \_atom\_site\_aniso\_U\_12  
 O5 0.0199(4) 0.0212(4) 0.0345(4) 0.0013(3) 0.0009(3) 0.0034(3)  
 O1 0.0311(5) 0.0341(5) 0.0406(5) -0.0127(4) 0.0147(4) 0.0052(4)  
 O6 0.0520(6) 0.0168(4) 0.0366(5) 0.0020(4) 0.0155(4) 0.0056(4)  
 O3 0.0305(5) 0.0301(5) 0.0223(4) 0.0044(4) 0.0119(3) 0.0046(4)  
 O4 0.0328(4) 0.0171(4) 0.0268(4) -0.0031(3) 0.0015(3) 0.0022(3)  
 O2 0.0416(5) 0.0390(5) 0.0387(5) -0.0023(4) 0.0240(4) 0.0051(4)  
 C11 0.0182(5) 0.0182(5) 0.0233(5) -0.0034(4) 0.0027(4) -0.0004(4)

C16 0.0188(5) 0.0212(5) 0.0226(5) -0.0058(4) 0.0034(4) -0.0004(4)  
C1 0.0208(5) 0.0287(6) 0.0229(5) -0.0057(4) 0.0055(4) -0.0016(5)  
C9 0.0213(5) 0.0172(5) 0.0157(5) 0.0027(4) 0.0055(3) 0.0024(4)  
C14 0.0287(5) 0.0202(5) 0.0327(6) -0.0088(5) 0.0011(4) 0.0054(5)  
C8 0.0231(5) 0.0168(5) 0.0238(5) -0.0006(4) 0.0057(4) 0.0028(4)  
C12 0.0245(5) 0.0177(5) 0.0246(5) -0.0035(4) 0.0061(4) 0.0018(4)  
C7 0.0234(5) 0.0151(5) 0.0224(5) -0.0009(4) 0.0027(4) 0.0012(4)  
C10 0.0190(5) 0.0175(5) 0.0242(5) -0.0001(4) 0.0073(4) 0.0031(4)  
C3 0.0273(5) 0.0360(7) 0.0179(5) 0.0011(5) 0.0079(4) -0.0041(5)  
C5 0.0256(5) 0.0264(6) 0.0215(5) 0.0020(5) -0.0004(4) -0.0007(4)  
C18 0.0323(6) 0.0323(6) 0.0281(6) -0.0077(5) -0.0009(5) -0.0024(5)  
C4 0.0263(5) 0.0323(6) 0.0221(5) 0.0010(5) 0.0047(4) -0.0073(5)  
C15 0.0215(5) 0.0251(6) 0.0269(5) -0.0100(5) 0.0026(4) 0.0018(5)  
C6 0.0305(6) 0.0222(6) 0.0249(6) 0.0047(4) -0.0003(4) 0.0021(5)  
C17 0.0361(7) 0.0482(9) 0.0198(5) -0.0012(5) 0.0039(4) -0.0096(6)  
C13 0.0317(6) 0.0185(5) 0.0246(5) -0.0023(4) 0.0013(4) 0.0015(4)

\_geom\_special\_details

;

All esds (except the esd in the dihedral angle between two l.s. planes) are estimated using the full covariance matrix. The cell esds are taken into account individually in the estimation of esds in distances, angles and torsion angles; correlations between esds in cell parameters are only used when they are defined by crystal symmetry. An approximate (isotropic) treatment of cell esds is used for estimating esds involving l.s. planes.

;

loop\_

\_geom\_bond\_atom\_site\_label\_1

\_geom\_bond\_atom\_site\_label\_2

\_geom\_bond\_distance

\_geom\_bond\_site\_symmetry\_2

\_geom\_bond\_publ\_flag

O5 C9 1.2133(14) . ?

O1 C15 1.3485(15) . ?

O6 C13 1.3535(16) . ?

O3 C1 1.3290(17) . ?

O3 C3 1.4658(15) . ?

O4 C7 1.4362(13) . ?

O4 C18 1.4326(14) . ?

O2 C1 1.2282(15) . ?

C11 C16 1.4273(16) . ?

C11 C12 1.3749(17) . ?

C11 C10 1.5108(15) . ?

C16 C1 1.4699(17) . ?

C16 C15 1.4230(16) . ?

C9 C8 1.5207(14) . ?

C9 C10 1.5096(15) . ?

C14 C15 1.3830(19) . ?

C14 C13 1.3821(19) . ?

C8 C7 1.5333(16) . ?

C12 C13 1.4009(16) . ?

C7 C6 1.5223(15) . ?

C3 C4 1.5245(19) . ?

C3 C17 1.5169(17) . ?

C5 C4 1.5342(18) . ?

C5 C6 1.5325(16) . ?

loop\_

\_geom\_angle\_atom\_site\_label\_1

\_geom\_angle\_atom\_site\_label\_2

\_geom\_angle\_atom\_site\_label\_3

\_geom\_angle



\_geom\_angle\_site\_symmetry\_1  
\_geom\_angle\_site\_symmetry\_3  
\_geom\_angle\_publ\_flag  
C1 O3 C3 118.15(9) . . ?  
C18 O4 C7 112.08(9) . . ?  
C16 C11 C10 124.20(10) . . ?  
C12 C11 C16 119.74(10) . . ?  
C12 C11 C10 116.07(10) . . ?  
C11 C16 C1 125.44(11) . . ?  
C15 C16 C11 117.23(11) . . ?  
C15 C16 C1 117.30(10) . . ?  
O3 C1 C16 115.42(9) . . ?  
O2 C1 O3 121.34(12) . . ?  
O2 C1 C16 123.22(12) . . ?  
O5 C9 C8 119.90(10) . . ?  
O5 C9 C10 123.22(10) . . ?  
C10 C9 C8 116.84(9) . . ?  
C13 C14 C15 119.63(11) . . ?  
C9 C8 C7 112.66(9) . . ?  
C11 C12 C13 121.63(11) . . ?  
O4 C7 C8 110.82(9) . . ?  
O4 C7 C6 107.81(9) . . ?  
C6 C7 C8 113.06(9) . . ?  
C9 C10 C11 115.52(9) . . ?  
O3 C3 C4 105.52(9) . . ?  
O3 C3 C17 108.00(11) . . ?  
C17 C3 C4 114.90(12) . . ?  
C6 C5 C4 113.13(9) . . ?  
C3 C4 C5 115.07(10) . . ?  
O1 C15 C16 122.14(12) . . ?

O1 C15 C14 115.98(11) . . ?  
C14 C15 C16 121.86(11) . . ?  
C7 C6 C5 113.07(10) . . ?  
O6 C13 C14 123.37(11) . . ?  
O6 C13 C12 116.91(11) . . ?  
C14 C13 C12 119.71(12) . . ?

\_olex2\_submission\_special\_instructions 'No special instructions were received'

## 7. CheckCIFPLATON report of compound 10

You have not supplied any structure factors. As a result the full set of tests cannot be run.

THIS REPORT IS FOR GUIDANCE ONLY. IF USED AS PART OF A REVIEW PROCEDURE FOR PUBLICATION, IT SHOULD NOT REPLACE THE EXPERTISE OF AN EXPERIENCED CRYSTALLOGRAPHIC REFEREE.

No syntax errors found.    CIF dictionary    Interpreting this report

### Datablock: 574-4-4

---

|                 |                                                     |                                            |
|-----------------|-----------------------------------------------------|--------------------------------------------|
| Bond precision: | C-C = 0.0017 A                                      | Wavelength=1.54184                         |
| Cell:           | a=5.05804 (7)    b=11.74745 (14)    c=13.77837 (18) | alpha=90    beta=100.1922 (13)    gamma=90 |
| Temperature:    | 150 K                                               |                                            |
|                 | Calculated                                          | Reported                                   |
| Volume          | 805.779(18)                                         | 805.778(18)                                |
| Space group     | P 21                                                | P 1 21 1                                   |
| Hall group      | P 2yb                                               | P 2yb                                      |
| Moiety formula  | C17 H22 O6                                          | C17 H22 O6                                 |
| Sum formula     | C17 H22 O6                                          | C17 H22 O6                                 |
| Mr              | 322.35                                              | 322.35                                     |
| Dx, g cm-3      | 1.329                                               | 1.329                                      |
| Z               | 2                                                   | 2                                          |
| Mu (mm-1)       | 0.836                                               | 0.836                                      |
| F000            | 344.0                                               | 344.0                                      |
| F000'           | 345.17                                              |                                            |
| h,k,lmax        | 6,14,17                                             | 6,14,17                                    |
| Nref            | 3359[ 1766]                                         | 3141                                       |
| Tmin,Tmax       |                                                     | 0.547,1.000                                |
| Tmin'           |                                                     |                                            |

Correction method= # Reported T Limits: Tmin=0.547 Tmax=1.000  
AbsCorr = MULTI-SCAN

Data completeness= 1.78/0.94    Theta(max)= 75.460

R(reflections)= 0.0333( 3123)    wR2(reflections)= 0.1007( 3141)

S = 0.971    Npar= 212

---

The following ALERTS were generated. Each ALERT has the format  
**test-name\_ALERT\_alert-type\_alert-level.**  
Click on the hyperlinks for more details of the test.

---

**Alert level C**

|                   |                                                         |              |
|-------------------|---------------------------------------------------------|--------------|
| CRYSC01_ALERT_1_C | No recognised colour has been given for crystal colour. |              |
| PLAT029_ALERT_3_C | _diffn_measured_fraction_theta_full Low .....           | 0.971 Note   |
| PLAT053_ALERT_1_C | Minimum Crystal Dimension Missing (or Error) ...        | Please Check |
| PLAT054_ALERT_1_C | Medium Crystal Dimension Missing (or Error) ...         | Please Check |
| PLAT055_ALERT_1_C | Maximum Crystal Dimension Missing (or Error) ...        | Please Check |

---

**Alert level G**

|                   |                                                 |             |
|-------------------|-------------------------------------------------|-------------|
| PLAT005_ALERT_5_G | No Embedded Refinement Details found in the CIF | Please Do ! |
| PLAT007_ALERT_5_G | Number of Unrefined Donor-H Atoms .....         | 2 Report    |
| PLAT791_ALERT_4_G | The Model has Chirality at C3 (Chiral SPGR)     | R Verify    |
| PLAT791_ALERT_4_G | The Model has Chirality at C7 (Chiral SPGR)     | S Verify    |

---

0 **ALERT level A** = Most likely a serious problem - resolve or explain  
0 **ALERT level B** = A potentially serious problem, consider carefully  
5 **ALERT level C** = Check. Ensure it is not caused by an omission or oversight  
4 **ALERT level G** = General information/check it is not something unexpected

4 ALERT type 1 CIF construction/syntax error, inconsistent or missing data  
0 ALERT type 2 Indicator that the structure model may be wrong or deficient  
1 ALERT type 3 Indicator that the structure quality may be low  
2 ALERT type 4 Improvement, methodology, query or suggestion  
2 ALERT type 5 Informative message, check

---

### Validation response form

Please find below a validation response form (VRF) that can be filled in and pasted into your CIF.

```
# start Validation Reply Form
_vrf_CRYSC01_574-4-4
;
PROBLEM: No recognised colour has been given for crystal colour.
RESPONSE: ...
;
_vrf_PLAT029_574-4-4
;
PROBLEM: _diffn_measured_fraction_theta_full Low ..... 0.971 Note
RESPONSE: ...
;
_vrf_PLAT053_574-4-4
;
PROBLEM: Minimum Crystal Dimension Missing (or Error) ... Please Check
RESPONSE: ...
;
_vrf_PLAT054_574-4-4
;
PROBLEM: Medium Crystal Dimension Missing (or Error) ... Please Check
RESPONSE: ...
;
_vrf_PLAT055_574-4-4
;
PROBLEM: Maximum Crystal Dimension Missing (or Error) ... Please Check
RESPONSE: ...
;
# end Validation Reply Form
```

---

It is advisable to attempt to resolve as many as possible of the alerts in all categories. Often the minor alerts point to easily fixed oversights, errors and omissions in your CIF or refinement strategy, so attention to these fine details can be worthwhile. In order to resolve some of the more serious problems it may be necessary to carry out additional measurements or structure refinements. However, the purpose of your study may justify the reported deviations and the more serious of these should normally be commented upon in the discussion or experimental section of a paper or in the "special\_details" fields of the CIF. checkCIF was carefully designed to identify outliers and unusual parameters, but every test has its limitations and alerts that are not important in a particular case may appear. Conversely, the absence of alerts does not guarantee there are no aspects of the results needing attention. It is up to the individual to critically assess their own results and, if necessary, seek expert advice.

#### Publication of your CIF in IUCr journals

A basic structural check has been run on your CIF. These basic checks will be run on all CIFs submitted for publication in IUCr journals (*Acta Crystallographica*, *Journal of Applied Crystallography*, *Journal of Synchrotron Radiation*); however, if you intend to submit to *Acta Crystallographica Section C* or *E*, you should make sure that full publication checks are run on the final version of your CIF prior to submission.

#### Publication of your CIF in other journals

Please refer to the *Notes for Authors* of the relevant journal for any special instructions relating to CIF submission.

---

**PLATON version of 19/11/2015; check.def file version of 17/11/2015**

Datablock 574-4-4 - ellipsoid plot

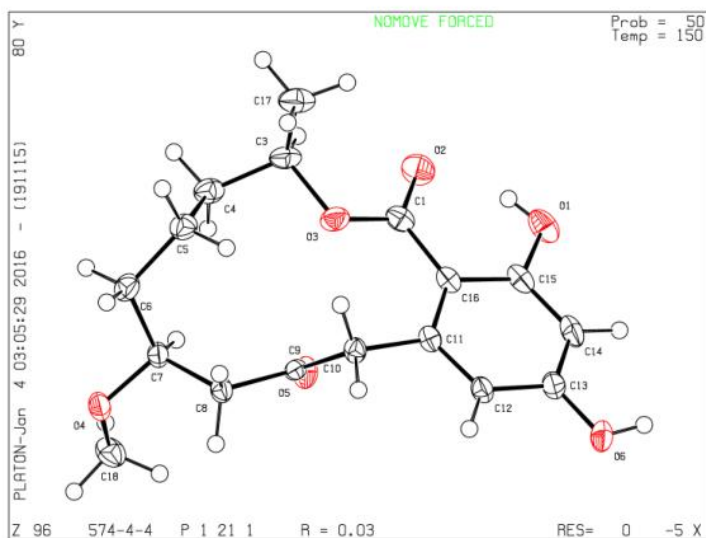

Supplement: srep27396-s1.pdf [file srep27396-s1.pdf]
